# Supplementary material for: Bridging the gap in medical education: comparing analysis of light microscopy and virtual microscopy in histology
Source: PeerJ. 2024 Jul 15;12:e17695. doi: 10.7717/peerj.17695 (PMC11257044; doi:10.7717/peerj.17695)
Supplement: Supplemental Information 1 [file peerj-12-17695-s001.xlsx]

## Sheet: Form Answers
Zaman damgası	A. Etkinlik [Işık mikroskop kullanarak zamanımı etkili bir şekilde yönetebildim]	A. Etkinlik [Işık mikroskop dersin amaç ve öğrenim hedefleri doğrultusunda etkilidir]	A. Etkinlik [Işık mikroskop kullanımı konuların akılda kalıcılığını artırdı]	A. Etkinlik [Işık mikroskop konuyu öğrenmeme yardımcı oldu]	A. Etkinlik [Işık mikroskopinin ders saatleri dışında kullanımı histoloji pratik sınavına hazırlanırken bilgilere erişimimi kolaylaştırdı.]	A. Etkinlik [Derste Işık mikroskop kullanımı histoloji konularına merakımı ve motivasyonumu artırdı.]	A. Etkinlik [Sanal mikroskop kullanarak zamanımı etkili bir şekilde yönetebildim]	A. Etkinlik [Sanal mikroskop dersin amaç ve öğrenim hedefleri doğrultusunda etkilidir]	A. Etkinlik [Sanal mikroskop kullanımı konuların akılda kalıcılığını artırdı.]	A. Etkinlik [Sanal mikroskop konuyu öğrenmeme yardımcı oldu]	A. Etkinlik [Sanal mikroskopinin ders saatleri dışında kullanımı histoloji pratik sınavına hazırlanırken bilgilere erişimimi kolaylaştırdı.]	A. Etkinlik [Derste sanal mikroskop kullanımı histoloji konularına merakımı ve motivasyonumu artırdı.]	B. Görüntü Kalitesi [Işık mikroskop, dokuları ayrıntılı biçimde büyüterek incelememi kolaylaştırdı]	B. Görüntü Kalitesi [Sanal mikroskop, dokuları ayrıntılı biçimde büyüterek incelememi kolaylaştırdı]	C. Kullanım Kolaylığı [Işık mikroskop kullanımı için talimatlar açık ve netti]	C. Kullanım Kolaylığı [Işık mikroskop kullanımı kolaydı]	C. Kullanım Kolaylığı [Işık mikroskop ile görüntüleri kolayca geziyorum]	C. Kullanım Kolaylığı [Sanal mikroskop kullanımı için talimatlar açık ve netti]	C. Kullanım Kolaylığı [Sanal mikroskop kullanımı kolaydı]	C. Kullanım Kolaylığı [Sanal mikroskop ile görüntüleri kolayca geziyorum]	D. İşbirlikli Kullanım [Işık mikroskobi, diğer öğrencilerle işbirliği yapmamı sağladı]	D. İşbirlikli Kullanım [Işık mikroskobu planlanan ders saati dışında ve istediğim mekanda kullanabilirim]	D. İşbirlikli Kullanım [Sanal mikroskobi, diğer öğrencilerle işbirliği yapmamı sağladı]	D. İşbirlikli Kullanım [Sanal mikroskobu planlanan ders saati dışında ve istediğim mekanda kullanabilirim]	E. Teknik Destek Alma [Işık mikroskop ders saati içerisinde kullanırken, kesitlere eğiticinin müdahalesi daha kolay oldu.]	E. Teknik Destek Alma [Işık mikroskop ile görüntüleri gezerken sorun yaşadım]	E. Teknik Destek Alma [Işık mikroskop kullanımı sırasında karşılaşılan teknik sorunlara hemen müdahale edilebilir]	E. Teknik Destek Alma [Işık mikroskop kullanımında eğitici desteğine daha çok ihtiyaç duyulmaktadır.]	E. Teknik Destek Alma [Sanal mikroskop ders saati içerisinde kullanırken, kesitlere eğiticinin müdahalesi daha kolay oldu.]	E. Teknik Destek Alma [Sanal mikroskop ile görüntüleri gezerken sorun yaşadım]	E. Teknik Destek Alma [Sanal mikroskop kullanımı sırasında karşılaşılan teknik sorunlara hemen müdahale edilebilir]	E. Teknik Destek Alma [Sanal mikroskop kullanımında eğitici desteğine daha çok ihtiyaç duyulmaktadır.]	F. Tercih/ eğlence durumu [Histoloji dersinde öğrenim aracı olarak Işık mikroskobu tercih ederim]	F. Tercih/ eğlence durumu [Işık mikroskobu histoloji eğitiminde kullanmak eğlencelidir.]	F. Tercih/ eğlence durumu [Histoloji dersinde öğrenim aracı olarak sanal mikroskobu tercih ederim]	F. Tercih/ eğlence durumu [Sanal mikroskobu histoloji eğitiminde kullanmak eğlencelidir.]	19. Sanal mikroskopi ve Işık mikroskopinin histoloji eğitiminize katkılarını ve geliştirilmesi gereken yönleri ile ilgili her türlü ek geri bildirimi yazınız.
2021-11-30 14:23:31	5. Kesinlikle katılıyorum	5. Kesinlikle katılıyorum	5. Kesinlikle katılıyorum	5. Kesinlikle katılıyorum	5. Kesinlikle katılıyorum	5. Kesinlikle katılıyorum	5. Kesinlikle katılıyorum	5. Kesinlikle katılıyorum	5. Kesinlikle katılıyorum	5. Kesinlikle katılıyorum	5. Kesinlikle katılıyorum	5. Kesinlikle katılıyorum	5. Kesinlikle katılıyorum	5. Kesinlikle katılıyorum	5. Kesinlikle katılıyorum	5. Kesinlikle katılıyorum	5. Kesinlikle katılıyorum	5. Kesinlikle katılıyorum	5. Kesinlikle katılıyorum	5. Kesinlikle katılıyorum	5. Kesinlikle katılıyorum	5. Kesinlikle katılıyorum	5. Kesinlikle katılıyorum	5. Kesinlikle katılıyorum	5. Kesinlikle katılıyorum	5. Kesinlikle katılıyorum	5. Kesinlikle katılıyorum	5. Kesinlikle katılıyorum	5. Kesinlikle katılıyorum	5. Kesinlikle katılıyorum	5. Kesinlikle katılıyorum	5. Kesinlikle katılıyorum	5. Kesinlikle katılıyorum	5. Kesinlikle katılıyorum	5. Kesinlikle katılıyorum	5. Kesinlikle katılıyorum
2021-11-30 14:43:03	5. Kesinlikle katılıyorum	4. Katılıyorum	4. Katılıyorum	4. Katılıyorum	4. Katılıyorum	4. Katılıyorum	4. Katılıyorum	4. Katılıyorum	4. Katılıyorum	4. Katılıyorum	4. Katılıyorum	4. Katılıyorum	4. Katılıyorum	4. Katılıyorum	4. Katılıyorum	4. Katılıyorum	4. Katılıyorum	4. Katılıyorum	4. Katılıyorum	4. Katılıyorum	4. Katılıyorum	4. Katılıyorum	4. Katılıyorum	4. Katılıyorum	4. Katılıyorum	4. Katılıyorum	4. Katılıyorum	4. Katılıyorum	4. Katılıyorum	4. Katılıyorum	4. Katılıyorum	4. Katılıyorum	4. Katılıyorum	4. Katılıyorum	4. Katılıyorum	4. Katılıyorum
2021-12-01 10:45:57	4. Katılıyorum	4. Katılıyorum	4. Katılıyorum	4. Katılıyorum	4. Katılıyorum	4. Katılıyorum	4. Katılıyorum	4. Katılıyorum	4. Katılıyorum	4. Katılıyorum	4. Katılıyorum	4. Katılıyorum	4. Katılıyorum	4. Katılıyorum	4. Katılıyorum	2. Katılmıyorum	4. Katılıyorum	4. Katılıyorum	4. Katılıyorum	4. Katılıyorum	4. Katılıyorum	2. Katılmıyorum	2. Katılmıyorum	4. Katılıyorum	4. Katılıyorum	4. Katılıyorum	2. Katılmıyorum	4. Katılıyorum	4. Katılıyorum	2. Katılmıyorum	4. Katılıyorum	2. Katılmıyorum	4. Katılıyorum	4. Katılıyorum	4. Katılıyorum	4. Katılıyorum
2021-12-01 10:46:08	2. Katılmıyorum	5. Kesinlikle katılıyorum	5. Kesinlikle katılıyorum	5. Kesinlikle katılıyorum	5. Kesinlikle katılıyorum	5. Kesinlikle katılıyorum	5. Kesinlikle katılıyorum	5. Kesinlikle katılıyorum	5. Kesinlikle katılıyorum	5. Kesinlikle katılıyorum	5. Kesinlikle katılıyorum	5. Kesinlikle katılıyorum	5. Kesinlikle katılıyorum	5. Kesinlikle katılıyorum	5. Kesinlikle katılıyorum	5. Kesinlikle katılıyorum	5. Kesinlikle katılıyorum	5. Kesinlikle katılıyorum	5. Kesinlikle katılıyorum	5. Kesinlikle katılıyorum	5. Kesinlikle katılıyorum	5. Kesinlikle katılıyorum	5. Kesinlikle katılıyorum	5. Kesinlikle katılıyorum	5. Kesinlikle katılıyorum	5. Kesinlikle katılıyorum	3. Kararsızım	5. Kesinlikle katılıyorum	5. Kesinlikle katılıyorum	5. Kesinlikle katılıyorum	3. Kararsızım	3. Kararsızım	5. Kesinlikle katılıyorum	5. Kesinlikle katılıyorum	3. Kararsızım	5. Kesinlikle katılıyorum
2021-12-01 10:48:17	4. Katılıyorum	4. Katılıyorum	4. Katılıyorum	5. Kesinlikle katılıyorum	5. Kesinlikle katılıyorum	4. Katılıyorum	4. Katılıyorum	4. Katılıyorum	5. Kesinlikle katılıyorum	5. Kesinlikle katılıyorum	5. Kesinlikle katılıyorum	5. Kesinlikle katılıyorum	4. Katılıyorum	4. Katılıyorum	4. Katılıyorum	4. Katılıyorum	4. Katılıyorum	4. Katılıyorum	4. Katılıyorum	4. Katılıyorum	4. Katılıyorum	4. Katılıyorum	4. Katılıyorum	4. Katılıyorum	4. Katılıyorum	3. Kararsızım	4. Katılıyorum	5. Kesinlikle katılıyorum	4. Katılıyorum	4. Katılıyorum	5. Kesinlikle katılıyorum	5. Kesinlikle katılıyorum	4. Katılıyorum	5. Kesinlikle katılıyorum	4. Katılıyorum	4. Katılıyorum
2021-12-01 10:49:23	4. Katılıyorum	4. Katılıyorum	4. Katılıyorum	4. Katılıyorum	5. Kesinlikle katılıyorum	5. Kesinlikle katılıyorum	3. Kararsızım	4. Katılıyorum	4. Katılıyorum	4. Katılıyorum	5. Kesinlikle katılıyorum	4. Katılıyorum	5. Kesinlikle katılıyorum	5. Kesinlikle katılıyorum	5. Kesinlikle katılıyorum	5. Kesinlikle katılıyorum	5. Kesinlikle katılıyorum	4. Katılıyorum	4. Katılıyorum	4. Katılıyorum	5. Kesinlikle katılıyorum	4. Katılıyorum	4. Katılıyorum	4. Katılıyorum	5. Kesinlikle katılıyorum	2. Katılmıyorum	4. Katılıyorum	2. Katılmıyorum	5. Kesinlikle katılıyorum	1. Kesinlikle katılmıyorum	4. Katılıyorum	1. Kesinlikle katılmıyorum	5. Kesinlikle katılıyorum	5. Kesinlikle katılıyorum	3. Kararsızım	3. Kararsızım
2021-12-01 10:49:28	3. Kararsızım	5. Kesinlikle katılıyorum	4. Katılıyorum	4. Katılıyorum	5. Kesinlikle katılıyorum	5. Kesinlikle katılıyorum	3. Kararsızım	5. Kesinlikle katılıyorum	4. Katılıyorum	4. Katılıyorum	5. Kesinlikle katılıyorum	5. Kesinlikle katılıyorum	2. Katılmıyorum	2. Katılmıyorum	4. Katılıyorum	3. Kararsızım	1. Kesinlikle katılmıyorum	4. Katılıyorum	3. Kararsızım	1. Kesinlikle katılmıyorum	3. Kararsızım	2. Katılmıyorum	3. Kararsızım	2. Katılmıyorum	3. Kararsızım	2. Katılmıyorum	2. Katılmıyorum	4. Katılıyorum	3. Kararsızım	2. Katılmıyorum	2. Katılmıyorum	4. Katılıyorum	4. Katılıyorum	5. Kesinlikle katılıyorum	4. Katılıyorum	5. Kesinlikle katılıyorum
2021-12-01 10:49:36	3. Kararsızım	3. Kararsızım	4. Katılıyorum	3. Kararsızım	4. Katılıyorum	3. Kararsızım	3. Kararsızım	4. Katılıyorum	2. Katılmıyorum	3. Kararsızım	1. Kesinlikle katılmıyorum	5. Kesinlikle katılıyorum	1. Kesinlikle katılmıyorum	1. Kesinlikle katılmıyorum	1. Kesinlikle katılmıyorum	1. Kesinlikle katılmıyorum	1. Kesinlikle katılmıyorum	2. Katılmıyorum	2. Katılmıyorum	2. Katılmıyorum	2. Katılmıyorum	2. Katılmıyorum	1. Kesinlikle katılmıyorum	3. Kararsızım	3. Kararsızım	4. Katılıyorum	5. Kesinlikle katılıyorum	4. Katılıyorum	4. Katılıyorum	5. Kesinlikle katılıyorum	5. Kesinlikle katılıyorum	4. Katılıyorum	5. Kesinlikle katılıyorum	4. Katılıyorum	5. Kesinlikle katılıyorum	4. Katılıyorum	iyiydi :/
2021-12-01 10:53:32	4. Katılıyorum	3. Kararsızım	1. Kesinlikle katılmıyorum	1. Kesinlikle katılmıyorum	3. Kararsızım	5. Kesinlikle katılıyorum	1. Kesinlikle katılmıyorum	4. Katılıyorum	2. Katılmıyorum	2. Katılmıyorum	1. Kesinlikle katılmıyorum	1. Kesinlikle katılmıyorum	3. Kararsızım	2. Katılmıyorum	4. Katılıyorum	5. Kesinlikle katılıyorum	5. Kesinlikle katılıyorum	1. Kesinlikle katılmıyorum	1. Kesinlikle katılmıyorum	1. Kesinlikle katılmıyorum	4. Katılıyorum	1. Kesinlikle katılmıyorum	2. Katılmıyorum	2. Katılmıyorum	1. Kesinlikle katılmıyorum	3. Kararsızım	2. Katılmıyorum	5. Kesinlikle katılıyorum	2. Katılmıyorum	2. Katılmıyorum	4. Katılıyorum	5. Kesinlikle katılıyorum	4. Katılıyorum	5. Kesinlikle katılıyorum	2. Katılmıyorum	2. Katılmıyorum	preparatların isimlendirilmesi doğru olmalı
2021-12-01 10:53:34	4. Katılıyorum	4. Katılıyorum	4. Katılıyorum	4. Katılıyorum	4. Katılıyorum	4. Katılıyorum	4. Katılıyorum	4. Katılıyorum	4. Katılıyorum	4. Katılıyorum	5. Kesinlikle katılıyorum	4. Katılıyorum	4. Katılıyorum	5. Kesinlikle katılıyorum	4. Katılıyorum	3. Kararsızım	3. Kararsızım	4. Katılıyorum	5. Kesinlikle katılıyorum	5. Kesinlikle katılıyorum	5. Kesinlikle katılıyorum	4. Katılıyorum	3. Kararsızım	4. Katılıyorum	4. Katılıyorum	3. Kararsızım	4. Katılıyorum	5. Kesinlikle katılıyorum	5. Kesinlikle katılıyorum	2. Katılmıyorum	5. Kesinlikle katılıyorum	1. Kesinlikle katılmıyorum	4. Katılıyorum	4. Katılıyorum	4. Katılıyorum	4. Katılıyorum	ışık mikroskopunda daha ayrıntılı inceleme yapabiliriz
2021-12-01 10:54:36	4. Katılıyorum	4. Katılıyorum	4. Katılıyorum	4. Katılıyorum	2. Katılmıyorum	3. Kararsızım	4. Katılıyorum	4. Katılıyorum	4. Katılıyorum	4. Katılıyorum	2. Katılmıyorum	3. Kararsızım	3. Kararsızım	3. Kararsızım	4. Katılıyorum	4. Katılıyorum	4. Katılıyorum	4. Katılıyorum	4. Katılıyorum	4. Katılıyorum	3. Kararsızım	3. Kararsızım	3. Kararsızım	3. Kararsızım	3. Kararsızım	2. Katılmıyorum	4. Katılıyorum	4. Katılıyorum	3. Kararsızım	2. Katılmıyorum	3. Kararsızım	3. Kararsızım	4. Katılıyorum	4. Katılıyorum	4. Katılıyorum	4. Katılıyorum	lab derslerinde amfi yerine daha fazla laboratuvarda, mikroskoplar ile vakit geçirmek daha faydalı olabilir
2021-12-01 10:56:51	4. Katılıyorum	5. Kesinlikle katılıyorum	4. Katılıyorum	5. Kesinlikle katılıyorum	5. Kesinlikle katılıyorum	4. Katılıyorum	5. Kesinlikle katılıyorum	5. Kesinlikle katılıyorum	4. Katılıyorum	4. Katılıyorum	4. Katılıyorum	4. Katılıyorum	4. Katılıyorum	4. Katılıyorum	4. Katılıyorum	4. Katılıyorum	5. Kesinlikle katılıyorum	5. Kesinlikle katılıyorum	4. Katılıyorum	5. Kesinlikle katılıyorum	5. Kesinlikle katılıyorum	4. Katılıyorum	5. Kesinlikle katılıyorum	4. Katılıyorum	5. Kesinlikle katılıyorum	4. Katılıyorum	3. Kararsızım	3. Kararsızım	4. Katılıyorum	4. Katılıyorum	3. Kararsızım	5. Kesinlikle katılıyorum	5. Kesinlikle katılıyorum	4. Katılıyorum	4. Katılıyorum	4. Katılıyorum
2021-12-01 10:57:53	5. Kesinlikle katılıyorum	5. Kesinlikle katılıyorum	5. Kesinlikle katılıyorum	5. Kesinlikle katılıyorum	4. Katılıyorum	5. Kesinlikle katılıyorum	4. Katılıyorum	4. Katılıyorum	4. Katılıyorum	4. Katılıyorum	4. Katılıyorum	4. Katılıyorum	4. Katılıyorum	4. Katılıyorum	4. Katılıyorum	4. Katılıyorum	4. Katılıyorum	4. Katılıyorum	4. Katılıyorum	4. Katılıyorum	4. Katılıyorum	4. Katılıyorum	4. Katılıyorum	5. Kesinlikle katılıyorum	4. Katılıyorum	5. Kesinlikle katılıyorum	4. Katılıyorum	4. Katılıyorum	4. Katılıyorum	4. Katılıyorum	4. Katılıyorum	4. Katılıyorum	4. Katılıyorum	4. Katılıyorum	4. Katılıyorum	4. Katılıyorum
2021-12-01 10:58:20	4. Katılıyorum	5. Kesinlikle katılıyorum	5. Kesinlikle katılıyorum	5. Kesinlikle katılıyorum	5. Kesinlikle katılıyorum	5. Kesinlikle katılıyorum	4. Katılıyorum	4. Katılıyorum	4. Katılıyorum	5. Kesinlikle katılıyorum	5. Kesinlikle katılıyorum	4. Katılıyorum	4. Katılıyorum	3. Kararsızım	5. Kesinlikle katılıyorum	5. Kesinlikle katılıyorum	4. Katılıyorum	5. Kesinlikle katılıyorum	5. Kesinlikle katılıyorum	5. Kesinlikle katılıyorum	5. Kesinlikle katılıyorum	3. Kararsızım	2. Katılmıyorum	5. Kesinlikle katılıyorum	3. Kararsızım	2. Katılmıyorum	5. Kesinlikle katılıyorum	5. Kesinlikle katılıyorum	5. Kesinlikle katılıyorum	1. Kesinlikle katılmıyorum	2. Katılmıyorum	1. Kesinlikle katılmıyorum	5. Kesinlikle katılıyorum	5. Kesinlikle katılıyorum	1. Kesinlikle katılmıyorum	3. Kararsızım	ışık mikroskobu preperat seçeneklerinin daha fazla olmalı ve yakınlaştırma sorunlarının giderilmeli.
2021-12-01 10:58:43	5. Kesinlikle katılıyorum	5. Kesinlikle katılıyorum	5. Kesinlikle katılıyorum	5. Kesinlikle katılıyorum	5. Kesinlikle katılıyorum	5. Kesinlikle katılıyorum	5. Kesinlikle katılıyorum	5. Kesinlikle katılıyorum	5. Kesinlikle katılıyorum	5. Kesinlikle katılıyorum	5. Kesinlikle katılıyorum	5. Kesinlikle katılıyorum	5. Kesinlikle katılıyorum	5. Kesinlikle katılıyorum	5. Kesinlikle katılıyorum	5. Kesinlikle katılıyorum	5. Kesinlikle katılıyorum	5. Kesinlikle katılıyorum	5. Kesinlikle katılıyorum	5. Kesinlikle katılıyorum	5. Kesinlikle katılıyorum	5. Kesinlikle katılıyorum	5. Kesinlikle katılıyorum	5. Kesinlikle katılıyorum	5. Kesinlikle katılıyorum	5. Kesinlikle katılıyorum	5. Kesinlikle katılıyorum	5. Kesinlikle katılıyorum	5. Kesinlikle katılıyorum	5. Kesinlikle katılıyorum	5. Kesinlikle katılıyorum	5. Kesinlikle katılıyorum	5. Kesinlikle katılıyorum	5. Kesinlikle katılıyorum	5. Kesinlikle katılıyorum	5. Kesinlikle katılıyorum	mikroskoplar daha kaliteli olmalı
2021-12-01 10:59:15	5. Kesinlikle katılıyorum	5. Kesinlikle katılıyorum	5. Kesinlikle katılıyorum	5. Kesinlikle katılıyorum	5. Kesinlikle katılıyorum	4. Katılıyorum	5. Kesinlikle katılıyorum	4. Katılıyorum	5. Kesinlikle katılıyorum	5. Kesinlikle katılıyorum	5. Kesinlikle katılıyorum	4. Katılıyorum	5. Kesinlikle katılıyorum	5. Kesinlikle katılıyorum	5. Kesinlikle katılıyorum	4. Katılıyorum	5. Kesinlikle katılıyorum	5. Kesinlikle katılıyorum	5. Kesinlikle katılıyorum	5. Kesinlikle katılıyorum	5. Kesinlikle katılıyorum	4. Katılıyorum	4. Katılıyorum	5. Kesinlikle katılıyorum	5. Kesinlikle katılıyorum	2. Katılmıyorum	4. Katılıyorum	3. Kararsızım	5. Kesinlikle katılıyorum	2. Katılmıyorum	4. Katılıyorum	3. Kararsızım	5. Kesinlikle katılıyorum	5. Kesinlikle katılıyorum	3. Kararsızım	4. Katılıyorum
2021-12-01 11:01:41	5. Kesinlikle katılıyorum	5. Kesinlikle katılıyorum	3. Kararsızım	3. Kararsızım	4. Katılıyorum	3. Kararsızım	4. Katılıyorum	4. Katılıyorum	4. Katılıyorum	4. Katılıyorum	4. Katılıyorum	4. Katılıyorum	3. Kararsızım	4. Katılıyorum	5. Kesinlikle katılıyorum	4. Katılıyorum	3. Kararsızım	4. Katılıyorum	4. Katılıyorum	5. Kesinlikle katılıyorum	4. Katılıyorum	4. Katılıyorum	4. Katılıyorum	4. Katılıyorum	4. Katılıyorum	5. Kesinlikle katılıyorum	3. Kararsızım	5. Kesinlikle katılıyorum	5. Kesinlikle katılıyorum	2. Katılmıyorum	4. Katılıyorum	3. Kararsızım	2. Katılmıyorum	3. Kararsızım	5. Kesinlikle katılıyorum	5. Kesinlikle katılıyorum
2021-12-01 11:02:31	4. Katılıyorum	4. Katılıyorum	4. Katılıyorum	4. Katılıyorum	4. Katılıyorum	4. Katılıyorum	4. Katılıyorum	4. Katılıyorum	4. Katılıyorum	4. Katılıyorum	4. Katılıyorum	4. Katılıyorum	4. Katılıyorum	4. Katılıyorum	4. Katılıyorum	4. Katılıyorum	4. Katılıyorum	4. Katılıyorum	4. Katılıyorum	4. Katılıyorum	4. Katılıyorum	4. Katılıyorum	4. Katılıyorum	4. Katılıyorum	4. Katılıyorum	4. Katılıyorum	4. Katılıyorum	4. Katılıyorum	4. Katılıyorum	4. Katılıyorum	4. Katılıyorum	4. Katılıyorum	4. Katılıyorum	4. Katılıyorum	4. Katılıyorum	4. Katılıyorum	iyi begeniyorum
2021-12-01 11:03:09	4. Katılıyorum	4. Katılıyorum	3. Kararsızım	3. Kararsızım	2. Katılmıyorum	4. Katılıyorum	4. Katılıyorum	5. Kesinlikle katılıyorum	5. Kesinlikle katılıyorum	4. Katılıyorum	5. Kesinlikle katılıyorum	3. Kararsızım	3. Kararsızım	4. Katılıyorum	4. Katılıyorum	3. Kararsızım	4. Katılıyorum	5. Kesinlikle katılıyorum	5. Kesinlikle katılıyorum	5. Kesinlikle katılıyorum	4. Katılıyorum	1. Kesinlikle katılmıyorum	3. Kararsızım	5. Kesinlikle katılıyorum	4. Katılıyorum	4. Katılıyorum	4. Katılıyorum	5. Kesinlikle katılıyorum	3. Kararsızım	1. Kesinlikle katılmıyorum	4. Katılıyorum	1. Kesinlikle katılmıyorum	3. Kararsızım	4. Katılıyorum	4. Katılıyorum	5. Kesinlikle katılıyorum	sanal mikroskopi çok daha ulaşılabilir ve her şey çok daha net
2021-12-01 11:03:22	5. Kesinlikle katılıyorum	5. Kesinlikle katılıyorum	5. Kesinlikle katılıyorum	5. Kesinlikle katılıyorum	5. Kesinlikle katılıyorum	5. Kesinlikle katılıyorum	5. Kesinlikle katılıyorum	5. Kesinlikle katılıyorum	5. Kesinlikle katılıyorum	5. Kesinlikle katılıyorum	5. Kesinlikle katılıyorum	4. Katılıyorum	5. Kesinlikle katılıyorum	4. Katılıyorum	5. Kesinlikle katılıyorum	5. Kesinlikle katılıyorum	5. Kesinlikle katılıyorum	5. Kesinlikle katılıyorum	5. Kesinlikle katılıyorum	5. Kesinlikle katılıyorum	5. Kesinlikle katılıyorum	2. Katılmıyorum	5. Kesinlikle katılıyorum	5. Kesinlikle katılıyorum	5. Kesinlikle katılıyorum	2. Katılmıyorum	5. Kesinlikle katılıyorum	5. Kesinlikle katılıyorum	4. Katılıyorum	2. Katılmıyorum	5. Kesinlikle katılıyorum	3. Kararsızım	5. Kesinlikle katılıyorum	5. Kesinlikle katılıyorum	3. Kararsızım	5. Kesinlikle katılıyorum
2021-12-01 11:04:42	4. Katılıyorum	5. Kesinlikle katılıyorum	4. Katılıyorum	4. Katılıyorum	5. Kesinlikle katılıyorum	5. Kesinlikle katılıyorum	4. Katılıyorum	5. Kesinlikle katılıyorum	4. Katılıyorum	4. Katılıyorum	4. Katılıyorum	4. Katılıyorum	4. Katılıyorum	4. Katılıyorum	4. Katılıyorum	4. Katılıyorum	4. Katılıyorum	4. Katılıyorum	4. Katılıyorum	4. Katılıyorum	5. Kesinlikle katılıyorum	2. Katılmıyorum	4. Katılıyorum	4. Katılıyorum	4. Katılıyorum	3. Kararsızım	3. Kararsızım	4. Katılıyorum	4. Katılıyorum	3. Kararsızım	4. Katılıyorum	4. Katılıyorum	4. Katılıyorum	4. Katılıyorum	4. Katılıyorum	4. Katılıyorum	İSTEDİĞİM ZAMAN KULLANAMAMAK
2021-12-01 11:06:04	4. Katılıyorum	4. Katılıyorum	3. Kararsızım	3. Kararsızım	5. Kesinlikle katılıyorum	3. Kararsızım	5. Kesinlikle katılıyorum	5. Kesinlikle katılıyorum	4. Katılıyorum	4. Katılıyorum	5. Kesinlikle katılıyorum	2. Katılmıyorum	4. Katılıyorum	5. Kesinlikle katılıyorum	5. Kesinlikle katılıyorum	3. Kararsızım	5. Kesinlikle katılıyorum	5. Kesinlikle katılıyorum	5. Kesinlikle katılıyorum	5. Kesinlikle katılıyorum	5. Kesinlikle katılıyorum	5. Kesinlikle katılıyorum	1. Kesinlikle katılmıyorum	5. Kesinlikle katılıyorum	5. Kesinlikle katılıyorum	1. Kesinlikle katılmıyorum	5. Kesinlikle katılıyorum	5. Kesinlikle katılıyorum	1. Kesinlikle katılmıyorum	1. Kesinlikle katılmıyorum	4. Katılıyorum	1. Kesinlikle katılmıyorum	5. Kesinlikle katılıyorum	5. Kesinlikle katılıyorum	4. Katılıyorum	2. Katılmıyorum	Histoloji mikroskobunda görüntüler daha çok akılda kalıcı
2021-12-01 11:06:43	5. Kesinlikle katılıyorum	5. Kesinlikle katılıyorum	4. Katılıyorum	4. Katılıyorum	3. Kararsızım	5. Kesinlikle katılıyorum	5. Kesinlikle katılıyorum	5. Kesinlikle katılıyorum	5. Kesinlikle katılıyorum	5. Kesinlikle katılıyorum	5. Kesinlikle katılıyorum	2. Katılmıyorum	5. Kesinlikle katılıyorum	5. Kesinlikle katılıyorum	5. Kesinlikle katılıyorum	5. Kesinlikle katılıyorum	5. Kesinlikle katılıyorum	5. Kesinlikle katılıyorum	5. Kesinlikle katılıyorum	5. Kesinlikle katılıyorum	5. Kesinlikle katılıyorum	5. Kesinlikle katılıyorum	3. Kararsızım	5. Kesinlikle katılıyorum	5. Kesinlikle katılıyorum	1. Kesinlikle katılmıyorum	5. Kesinlikle katılıyorum	4. Katılıyorum	1. Kesinlikle katılmıyorum	1. Kesinlikle katılmıyorum	1. Kesinlikle katılmıyorum	1. Kesinlikle katılmıyorum	5. Kesinlikle katılıyorum	5. Kesinlikle katılıyorum	2. Katılmıyorum	2. Katılmıyorum
2021-12-01 11:07:28	4. Katılıyorum	5. Kesinlikle katılıyorum	5. Kesinlikle katılıyorum	5. Kesinlikle katılıyorum	4. Katılıyorum	5. Kesinlikle katılıyorum	3. Kararsızım	4. Katılıyorum	4. Katılıyorum	5. Kesinlikle katılıyorum	5. Kesinlikle katılıyorum	5. Kesinlikle katılıyorum	5. Kesinlikle katılıyorum	5. Kesinlikle katılıyorum	4. Katılıyorum	3. Kararsızım	4. Katılıyorum	4. Katılıyorum	4. Katılıyorum	5. Kesinlikle katılıyorum	5. Kesinlikle katılıyorum	4. Katılıyorum	3. Kararsızım	4. Katılıyorum	3. Kararsızım	2. Katılmıyorum	5. Kesinlikle katılıyorum	5. Kesinlikle katılıyorum	3. Kararsızım	2. Katılmıyorum	4. Katılıyorum	2. Katılmıyorum	5. Kesinlikle katılıyorum	5. Kesinlikle katılıyorum	1. Kesinlikle katılmıyorum	3. Kararsızım	sanal mikroskop öğrenimde etkili,ancak ışık mikroskobunu kullanmak daha eğlenceli
2021-12-01 11:08:29	3. Kararsızım	5. Kesinlikle katılıyorum	4. Katılıyorum	4. Katılıyorum	5. Kesinlikle katılıyorum	4. Katılıyorum	3. Kararsızım	3. Kararsızım	3. Kararsızım	4. Katılıyorum	3. Kararsızım	2. Katılmıyorum	4. Katılıyorum	3. Kararsızım	3. Kararsızım	4. Katılıyorum	3. Kararsızım	3. Kararsızım	3. Kararsızım	3. Kararsızım	4. Katılıyorum	4. Katılıyorum	3. Kararsızım	3. Kararsızım	4. Katılıyorum	3. Kararsızım	4. Katılıyorum	4. Katılıyorum	3. Kararsızım	3. Kararsızım	4. Katılıyorum	3. Kararsızım	4. Katılıyorum	4. Katılıyorum	3. Kararsızım	3. Kararsızım
2021-12-01 11:08:32	3. Kararsızım	5. Kesinlikle katılıyorum	5. Kesinlikle katılıyorum	4. Katılıyorum	5. Kesinlikle katılıyorum	5. Kesinlikle katılıyorum	5. Kesinlikle katılıyorum	5. Kesinlikle katılıyorum	3. Kararsızım	4. Katılıyorum	5. Kesinlikle katılıyorum	4. Katılıyorum	4. Katılıyorum	5. Kesinlikle katılıyorum	4. Katılıyorum	4. Katılıyorum	3. Kararsızım	5. Kesinlikle katılıyorum	5. Kesinlikle katılıyorum	5. Kesinlikle katılıyorum	5. Kesinlikle katılıyorum	4. Katılıyorum	3. Kararsızım	5. Kesinlikle katılıyorum	4. Katılıyorum	4. Katılıyorum	3. Kararsızım	5. Kesinlikle katılıyorum	5. Kesinlikle katılıyorum	2. Katılmıyorum	5. Kesinlikle katılıyorum	2. Katılmıyorum	5. Kesinlikle katılıyorum	5. Kesinlikle katılıyorum	4. Katılıyorum	3. Kararsızım
2021-12-01 11:10:01	2. Katılmıyorum	3. Kararsızım	1. Kesinlikle katılmıyorum	4. Katılıyorum	1. Kesinlikle katılmıyorum	1. Kesinlikle katılmıyorum	5. Kesinlikle katılıyorum	5. Kesinlikle katılıyorum	5. Kesinlikle katılıyorum	4. Katılıyorum	5. Kesinlikle katılıyorum	3. Kararsızım	3. Kararsızım	4. Katılıyorum	3. Kararsızım	2. Katılmıyorum	1. Kesinlikle katılmıyorum	4. Katılıyorum	5. Kesinlikle katılıyorum	5. Kesinlikle katılıyorum	4. Katılıyorum	2. Katılmıyorum	3. Kararsızım	5. Kesinlikle katılıyorum	2. Katılmıyorum	5. Kesinlikle katılıyorum	4. Katılıyorum	5. Kesinlikle katılıyorum	5. Kesinlikle katılıyorum	2. Katılmıyorum	5. Kesinlikle katılıyorum	1. Kesinlikle katılmıyorum	2. Katılmıyorum	4. Katılıyorum	5. Kesinlikle katılıyorum	4. Katılıyorum	sanal mikroskpiye ulaşmak daha kolay olduğundan her yerde kullanabilmemizden dolayı iyi
2021-12-01 11:11:11	5. Kesinlikle katılıyorum	5. Kesinlikle katılıyorum	5. Kesinlikle katılıyorum	5. Kesinlikle katılıyorum	5. Kesinlikle katılıyorum	5. Kesinlikle katılıyorum	5. Kesinlikle katılıyorum	5. Kesinlikle katılıyorum	5. Kesinlikle katılıyorum	5. Kesinlikle katılıyorum	5. Kesinlikle katılıyorum	5. Kesinlikle katılıyorum	5. Kesinlikle katılıyorum	5. Kesinlikle katılıyorum	5. Kesinlikle katılıyorum	5. Kesinlikle katılıyorum	5. Kesinlikle katılıyorum	5. Kesinlikle katılıyorum	5. Kesinlikle katılıyorum	5. Kesinlikle katılıyorum	5. Kesinlikle katılıyorum	5. Kesinlikle katılıyorum	5. Kesinlikle katılıyorum	5. Kesinlikle katılıyorum	5. Kesinlikle katılıyorum	5. Kesinlikle katılıyorum	5. Kesinlikle katılıyorum	5. Kesinlikle katılıyorum	5. Kesinlikle katılıyorum	5. Kesinlikle katılıyorum	5. Kesinlikle katılıyorum	5. Kesinlikle katılıyorum	5. Kesinlikle katılıyorum	5. Kesinlikle katılıyorum	5. Kesinlikle katılıyorum	5. Kesinlikle katılıyorum	helal olsun
2021-12-01 11:12:13	4. Katılıyorum	4. Katılıyorum	3. Kararsızım	4. Katılıyorum	2. Katılmıyorum	3. Kararsızım	3. Kararsızım	4. Katılıyorum	4. Katılıyorum	4. Katılıyorum	2. Katılmıyorum	3. Kararsızım	4. Katılıyorum	4. Katılıyorum	4. Katılıyorum	4. Katılıyorum	4. Katılıyorum	2. Katılmıyorum	3. Kararsızım	3. Kararsızım	3. Kararsızım	1. Kesinlikle katılmıyorum	2. Katılmıyorum	3. Kararsızım	3. Kararsızım	2. Katılmıyorum	3. Kararsızım	4. Katılıyorum	4. Katılıyorum	3. Kararsızım	4. Katılıyorum	3. Kararsızım	4. Katılıyorum	4. Katılıyorum	4. Katılıyorum	3. Kararsızım
2021-12-01 11:12:15	4. Katılıyorum	5. Kesinlikle katılıyorum	4. Katılıyorum	5. Kesinlikle katılıyorum	5. Kesinlikle katılıyorum	5. Kesinlikle katılıyorum	4. Katılıyorum	1. Kesinlikle katılmıyorum	3. Kararsızım	2. Katılmıyorum	4. Katılıyorum	1. Kesinlikle katılmıyorum	5. Kesinlikle katılıyorum	1. Kesinlikle katılmıyorum	5. Kesinlikle katılıyorum	5. Kesinlikle katılıyorum	5. Kesinlikle katılıyorum	4. Katılıyorum	4. Katılıyorum	4. Katılıyorum	5. Kesinlikle katılıyorum	5. Kesinlikle katılıyorum	1. Kesinlikle katılmıyorum	4. Katılıyorum	5. Kesinlikle katılıyorum	1. Kesinlikle katılmıyorum	5. Kesinlikle katılıyorum	4. Katılıyorum	2. Katılmıyorum	2. Katılmıyorum	1. Kesinlikle katılmıyorum	2. Katılmıyorum	5. Kesinlikle katılıyorum	5. Kesinlikle katılıyorum	1. Kesinlikle katılmıyorum	1. Kesinlikle katılmıyorum	ışık mikroskobunun çalışma hayatımda bana sağlayacağı katkıların daha fazla olduğunu düşünüyorum.
2021-12-01 11:12:48	3. Kararsızım	4. Katılıyorum	3. Kararsızım	3. Kararsızım	5. Kesinlikle katılıyorum	5. Kesinlikle katılıyorum	4. Katılıyorum	4. Katılıyorum	4. Katılıyorum	4. Katılıyorum	5. Kesinlikle katılıyorum	2. Katılmıyorum	2. Katılmıyorum	4. Katılıyorum	2. Katılmıyorum	2. Katılmıyorum	2. Katılmıyorum	4. Katılıyorum	4. Katılıyorum	4. Katılıyorum	5. Kesinlikle katılıyorum	4. Katılıyorum	2. Katılmıyorum	5. Kesinlikle katılıyorum	4. Katılıyorum	4. Katılıyorum	4. Katılıyorum	4. Katılıyorum	4. Katılıyorum	1. Kesinlikle katılmıyorum	4. Katılıyorum	2. Katılmıyorum	4. Katılıyorum	5. Kesinlikle katılıyorum	3. Kararsızım	2. Katılmıyorum
2021-12-01 11:13:12	4. Katılıyorum	4. Katılıyorum	4. Katılıyorum	4. Katılıyorum	4. Katılıyorum	4. Katılıyorum	3. Kararsızım	4. Katılıyorum	4. Katılıyorum	4. Katılıyorum	4. Katılıyorum	4. Katılıyorum	4. Katılıyorum	4. Katılıyorum	4. Katılıyorum	4. Katılıyorum	4. Katılıyorum	4. Katılıyorum	4. Katılıyorum	4. Katılıyorum	4. Katılıyorum	4. Katılıyorum	4. Katılıyorum	4. Katılıyorum	4. Katılıyorum	4. Katılıyorum	4. Katılıyorum	4. Katılıyorum	4. Katılıyorum	4. Katılıyorum	4. Katılıyorum	4. Katılıyorum	4. Katılıyorum	4. Katılıyorum	4. Katılıyorum	4. Katılıyorum
2021-12-01 11:14:05	4. Katılıyorum	4. Katılıyorum	3. Kararsızım	4. Katılıyorum	5. Kesinlikle katılıyorum	4. Katılıyorum	5. Kesinlikle katılıyorum	5. Kesinlikle katılıyorum	5. Kesinlikle katılıyorum	5. Kesinlikle katılıyorum	5. Kesinlikle katılıyorum	5. Kesinlikle katılıyorum	4. Katılıyorum	5. Kesinlikle katılıyorum	4. Katılıyorum	4. Katılıyorum	3. Kararsızım	5. Kesinlikle katılıyorum	5. Kesinlikle katılıyorum	5. Kesinlikle katılıyorum	5. Kesinlikle katılıyorum	5. Kesinlikle katılıyorum	2. Katılmıyorum	5. Kesinlikle katılıyorum	4. Katılıyorum	4. Katılıyorum	3. Kararsızım	5. Kesinlikle katılıyorum	5. Kesinlikle katılıyorum	2. Katılmıyorum	3. Kararsızım	2. Katılmıyorum	3. Kararsızım	4. Katılıyorum	5. Kesinlikle katılıyorum	4. Katılıyorum
2021-12-01 11:15:27	3. Kararsızım	5. Kesinlikle katılıyorum	5. Kesinlikle katılıyorum	5. Kesinlikle katılıyorum	3. Kararsızım	5. Kesinlikle katılıyorum	3. Kararsızım	5. Kesinlikle katılıyorum	5. Kesinlikle katılıyorum	5. Kesinlikle katılıyorum	5. Kesinlikle katılıyorum	5. Kesinlikle katılıyorum	5. Kesinlikle katılıyorum	5. Kesinlikle katılıyorum	5. Kesinlikle katılıyorum	3. Kararsızım	3. Kararsızım	5. Kesinlikle katılıyorum	5. Kesinlikle katılıyorum	5. Kesinlikle katılıyorum	5. Kesinlikle katılıyorum	5. Kesinlikle katılıyorum	5. Kesinlikle katılıyorum	5. Kesinlikle katılıyorum	3. Kararsızım	4. Katılıyorum	4. Katılıyorum	5. Kesinlikle katılıyorum	5. Kesinlikle katılıyorum	3. Kararsızım	5. Kesinlikle katılıyorum	4. Katılıyorum	5. Kesinlikle katılıyorum	5. Kesinlikle katılıyorum	3. Kararsızım	3. Kararsızım
2021-12-01 11:16:33	4. Katılıyorum	4. Katılıyorum	3. Kararsızım	4. Katılıyorum	5. Kesinlikle katılıyorum	3. Kararsızım	4. Katılıyorum	4. Katılıyorum	4. Katılıyorum	4. Katılıyorum	5. Kesinlikle katılıyorum	2. Katılmıyorum	4. Katılıyorum	5. Kesinlikle katılıyorum	3. Kararsızım	3. Kararsızım	4. Katılıyorum	4. Katılıyorum	4. Katılıyorum	5. Kesinlikle katılıyorum	5. Kesinlikle katılıyorum	5. Kesinlikle katılıyorum	2. Katılmıyorum	4. Katılıyorum	3. Kararsızım	4. Katılıyorum	4. Katılıyorum	5. Kesinlikle katılıyorum	3. Kararsızım	2. Katılmıyorum	5. Kesinlikle katılıyorum	1. Kesinlikle katılmıyorum	3. Kararsızım	4. Katılıyorum	3. Kararsızım	3. Kararsızım
2021-12-01 11:16:55	2. Katılmıyorum	4. Katılıyorum	3. Kararsızım	3. Kararsızım	2. Katılmıyorum	4. Katılıyorum	5. Kesinlikle katılıyorum	5. Kesinlikle katılıyorum	4. Katılıyorum	4. Katılıyorum	5. Kesinlikle katılıyorum	3. Kararsızım	5. Kesinlikle katılıyorum	5. Kesinlikle katılıyorum	5. Kesinlikle katılıyorum	5. Kesinlikle katılıyorum	4. Katılıyorum	5. Kesinlikle katılıyorum	4. Katılıyorum	4. Katılıyorum	5. Kesinlikle katılıyorum	1. Kesinlikle katılmıyorum	2. Katılmıyorum	5. Kesinlikle katılıyorum	3. Kararsızım	4. Katılıyorum	4. Katılıyorum	5. Kesinlikle katılıyorum	5. Kesinlikle katılıyorum	3. Kararsızım	2. Katılmıyorum	2. Katılmıyorum	2. Katılmıyorum	5. Kesinlikle katılıyorum	5. Kesinlikle katılıyorum	5. Kesinlikle katılıyorum
2021-12-01 11:17:40	3. Kararsızım	4. Katılıyorum	4. Katılıyorum	3. Kararsızım	2. Katılmıyorum	4. Katılıyorum	4. Katılıyorum	3. Kararsızım	4. Katılıyorum	4. Katılıyorum	3. Kararsızım	4. Katılıyorum	4. Katılıyorum	4. Katılıyorum	4. Katılıyorum	3. Kararsızım	4. Katılıyorum	4. Katılıyorum	4. Katılıyorum	3. Kararsızım	3. Kararsızım	1. Kesinlikle katılmıyorum	3. Kararsızım	2. Katılmıyorum	3. Kararsızım	3. Kararsızım	4. Katılıyorum	3. Kararsızım	3. Kararsızım	2. Katılmıyorum	3. Kararsızım	4. Katılıyorum	3. Kararsızım	3. Kararsızım	4. Katılıyorum	4. Katılıyorum	daha çok kullanıma açık olmalı
2021-12-01 11:17:59	4. Katılıyorum	4. Katılıyorum	4. Katılıyorum	4. Katılıyorum	3. Kararsızım	3. Kararsızım	4. Katılıyorum	4. Katılıyorum	4. Katılıyorum	4. Katılıyorum	4. Katılıyorum	3. Kararsızım	5. Kesinlikle katılıyorum	4. Katılıyorum	4. Katılıyorum	4. Katılıyorum	4. Katılıyorum	4. Katılıyorum	4. Katılıyorum	4. Katılıyorum	3. Kararsızım	4. Katılıyorum	3. Kararsızım	4. Katılıyorum	4. Katılıyorum	3. Kararsızım	4. Katılıyorum	4. Katılıyorum	4. Katılıyorum	3. Kararsızım	4. Katılıyorum	3. Kararsızım	4. Katılıyorum	4. Katılıyorum	3. Kararsızım	3. Kararsızım
2021-12-01 11:18:46	3. Kararsızım	3. Kararsızım	3. Kararsızım	3. Kararsızım	3. Kararsızım	3. Kararsızım	3. Kararsızım	3. Kararsızım	3. Kararsızım	3. Kararsızım	3. Kararsızım	3. Kararsızım	3. Kararsızım	3. Kararsızım	3. Kararsızım	3. Kararsızım	3. Kararsızım	3. Kararsızım	3. Kararsızım	3. Kararsızım	3. Kararsızım	3. Kararsızım	3. Kararsızım	3. Kararsızım	3. Kararsızım	3. Kararsızım	3. Kararsızım	3. Kararsızım	3. Kararsızım	3. Kararsızım	3. Kararsızım	3. Kararsızım	3. Kararsızım	3. Kararsızım	3. Kararsızım	3. Kararsızım
2021-12-01 11:18:52	5. Kesinlikle katılıyorum	4. Katılıyorum	4. Katılıyorum	4. Katılıyorum	2. Katılmıyorum	4. Katılıyorum	5. Kesinlikle katılıyorum	5. Kesinlikle katılıyorum	5. Kesinlikle katılıyorum	5. Kesinlikle katılıyorum	5. Kesinlikle katılıyorum	3. Kararsızım	5. Kesinlikle katılıyorum	4. Katılıyorum	4. Katılıyorum	4. Katılıyorum	4. Katılıyorum	4. Katılıyorum	4. Katılıyorum	4. Katılıyorum	4. Katılıyorum	2. Katılmıyorum	2. Katılmıyorum	5. Kesinlikle katılıyorum	4. Katılıyorum	2. Katılmıyorum	4. Katılıyorum	3. Kararsızım	5. Kesinlikle katılıyorum	1. Kesinlikle katılmıyorum	4. Katılıyorum	2. Katılmıyorum	5. Kesinlikle katılıyorum	5. Kesinlikle katılıyorum	5. Kesinlikle katılıyorum	5. Kesinlikle katılıyorum
2021-12-01 11:21:01	5. Kesinlikle katılıyorum	5. Kesinlikle katılıyorum	5. Kesinlikle katılıyorum	5. Kesinlikle katılıyorum	5. Kesinlikle katılıyorum	4. Katılıyorum	3. Kararsızım	4. Katılıyorum	4. Katılıyorum	4. Katılıyorum	5. Kesinlikle katılıyorum	3. Kararsızım	5. Kesinlikle katılıyorum	4. Katılıyorum	5. Kesinlikle katılıyorum	5. Kesinlikle katılıyorum	5. Kesinlikle katılıyorum	4. Katılıyorum	4. Katılıyorum	2. Katılmıyorum	5. Kesinlikle katılıyorum	5. Kesinlikle katılıyorum	4. Katılıyorum	5. Kesinlikle katılıyorum	5. Kesinlikle katılıyorum	1. Kesinlikle katılmıyorum	4. Katılıyorum	5. Kesinlikle katılıyorum	4. Katılıyorum	2. Katılmıyorum	4. Katılıyorum	2. Katılmıyorum	5. Kesinlikle katılıyorum	5. Kesinlikle katılıyorum	2. Katılmıyorum	2. Katılmıyorum
2021-12-01 11:21:02	5. Kesinlikle katılıyorum	5. Kesinlikle katılıyorum	5. Kesinlikle katılıyorum	5. Kesinlikle katılıyorum	5. Kesinlikle katılıyorum	5. Kesinlikle katılıyorum	4. Katılıyorum	3. Kararsızım	4. Katılıyorum	4. Katılıyorum	5. Kesinlikle katılıyorum	4. Katılıyorum	5. Kesinlikle katılıyorum	4. Katılıyorum	5. Kesinlikle katılıyorum	5. Kesinlikle katılıyorum	5. Kesinlikle katılıyorum	4. Katılıyorum	4. Katılıyorum	5. Kesinlikle katılıyorum	5. Kesinlikle katılıyorum	5. Kesinlikle katılıyorum	3. Kararsızım	5. Kesinlikle katılıyorum	5. Kesinlikle katılıyorum	5. Kesinlikle katılıyorum	4. Katılıyorum	5. Kesinlikle katılıyorum	4. Katılıyorum	5. Kesinlikle katılıyorum	5. Kesinlikle katılıyorum	5. Kesinlikle katılıyorum	5. Kesinlikle katılıyorum	5. Kesinlikle katılıyorum	4. Katılıyorum	4. Katılıyorum
2021-12-01 11:21:12	2. Katılmıyorum	5. Kesinlikle katılıyorum	3. Kararsızım	2. Katılmıyorum	1. Kesinlikle katılmıyorum	3. Kararsızım	4. Katılıyorum	4. Katılıyorum	3. Kararsızım	3. Kararsızım	3. Kararsızım	2. Katılmıyorum	3. Kararsızım	3. Kararsızım	1. Kesinlikle katılmıyorum	1. Kesinlikle katılmıyorum	1. Kesinlikle katılmıyorum	3. Kararsızım	3. Kararsızım	3. Kararsızım	4. Katılıyorum	1. Kesinlikle katılmıyorum	3. Kararsızım	3. Kararsızım	3. Kararsızım	4. Katılıyorum	3. Kararsızım	3. Kararsızım	3. Kararsızım	3. Kararsızım	3. Kararsızım	3. Kararsızım	4. Katılıyorum	4. Katılıyorum	3. Kararsızım	3. Kararsızım
2021-12-01 11:21:45	4. Katılıyorum	5. Kesinlikle katılıyorum	5. Kesinlikle katılıyorum	4. Katılıyorum	4. Katılıyorum	5. Kesinlikle katılıyorum	2. Katılmıyorum	2. Katılmıyorum	2. Katılmıyorum	2. Katılmıyorum	3. Kararsızım	3. Kararsızım	5. Kesinlikle katılıyorum	3. Kararsızım	5. Kesinlikle katılıyorum	5. Kesinlikle katılıyorum	5. Kesinlikle katılıyorum	3. Kararsızım	3. Kararsızım	3. Kararsızım	4. Katılıyorum	3. Kararsızım	3. Kararsızım	3. Kararsızım	5. Kesinlikle katılıyorum	3. Kararsızım	4. Katılıyorum	4. Katılıyorum	3. Kararsızım	3. Kararsızım	3. Kararsızım	5. Kesinlikle katılıyorum	5. Kesinlikle katılıyorum	5. Kesinlikle katılıyorum	2. Katılmıyorum	2. Katılmıyorum
2021-12-01 11:23:42	4. Katılıyorum	5. Kesinlikle katılıyorum	5. Kesinlikle katılıyorum	3. Kararsızım	1. Kesinlikle katılmıyorum	3. Kararsızım	5. Kesinlikle katılıyorum	4. Katılıyorum	2. Katılmıyorum	4. Katılıyorum	5. Kesinlikle katılıyorum	1. Kesinlikle katılmıyorum	5. Kesinlikle katılıyorum	5. Kesinlikle katılıyorum	5. Kesinlikle katılıyorum	3. Kararsızım	3. Kararsızım	5. Kesinlikle katılıyorum	5. Kesinlikle katılıyorum	5. Kesinlikle katılıyorum	3. Kararsızım	1. Kesinlikle katılmıyorum	4. Katılıyorum	5. Kesinlikle katılıyorum	2. Katılmıyorum	1. Kesinlikle katılmıyorum	1. Kesinlikle katılmıyorum	5. Kesinlikle katılıyorum	5. Kesinlikle katılıyorum	1. Kesinlikle katılmıyorum	5. Kesinlikle katılıyorum	1. Kesinlikle katılmıyorum	5. Kesinlikle katılıyorum	5. Kesinlikle katılıyorum	5. Kesinlikle katılıyorum	5. Kesinlikle katılıyorum
2021-12-01 11:24:04	4. Katılıyorum	5. Kesinlikle katılıyorum	3. Kararsızım	3. Kararsızım	2. Katılmıyorum	4. Katılıyorum	4. Katılıyorum	2. Katılmıyorum	3. Kararsızım	3. Kararsızım	5. Kesinlikle katılıyorum	2. Katılmıyorum	3. Kararsızım	5. Kesinlikle katılıyorum	2. Katılmıyorum	2. Katılmıyorum	3. Kararsızım	4. Katılıyorum	4. Katılıyorum	4. Katılıyorum	3. Kararsızım	2. Katılmıyorum	2. Katılmıyorum	5. Kesinlikle katılıyorum	2. Katılmıyorum	3. Kararsızım	3. Kararsızım	4. Katılıyorum	4. Katılıyorum	2. Katılmıyorum	4. Katılıyorum	2. Katılmıyorum	5. Kesinlikle katılıyorum	5. Kesinlikle katılıyorum	3. Kararsızım	5. Kesinlikle katılıyorum
2021-12-01 11:25:29	5. Kesinlikle katılıyorum	5. Kesinlikle katılıyorum	5. Kesinlikle katılıyorum	5. Kesinlikle katılıyorum	5. Kesinlikle katılıyorum	5. Kesinlikle katılıyorum	5. Kesinlikle katılıyorum	5. Kesinlikle katılıyorum	5. Kesinlikle katılıyorum	5. Kesinlikle katılıyorum	5. Kesinlikle katılıyorum	5. Kesinlikle katılıyorum	5. Kesinlikle katılıyorum	5. Kesinlikle katılıyorum	5. Kesinlikle katılıyorum	5. Kesinlikle katılıyorum	5. Kesinlikle katılıyorum	5. Kesinlikle katılıyorum	5. Kesinlikle katılıyorum	5. Kesinlikle katılıyorum	5. Kesinlikle katılıyorum	5. Kesinlikle katılıyorum	5. Kesinlikle katılıyorum	5. Kesinlikle katılıyorum	5. Kesinlikle katılıyorum	5. Kesinlikle katılıyorum	5. Kesinlikle katılıyorum	5. Kesinlikle katılıyorum	5. Kesinlikle katılıyorum	5. Kesinlikle katılıyorum	5. Kesinlikle katılıyorum	5. Kesinlikle katılıyorum	5. Kesinlikle katılıyorum	5. Kesinlikle katılıyorum	5. Kesinlikle katılıyorum	5. Kesinlikle katılıyorum
2021-12-01 11:25:47	4. Katılıyorum	4. Katılıyorum	4. Katılıyorum	4. Katılıyorum	4. Katılıyorum	4. Katılıyorum	2. Katılmıyorum	2. Katılmıyorum	2. Katılmıyorum	2. Katılmıyorum	2. Katılmıyorum	2. Katılmıyorum	5. Kesinlikle katılıyorum	3. Kararsızım	2. Katılmıyorum	3. Kararsızım	4. Katılıyorum	4. Katılıyorum	4. Katılıyorum	4. Katılıyorum	4. Katılıyorum	2. Katılmıyorum	2. Katılmıyorum	5. Kesinlikle katılıyorum	2. Katılmıyorum	3. Kararsızım	2. Katılmıyorum	4. Katılıyorum	4. Katılıyorum	2. Katılmıyorum	4. Katılıyorum	2. Katılmıyorum	4. Katılıyorum	4. Katılıyorum	2. Katılmıyorum	2. Katılmıyorum
2021-12-01 11:27:12	4. Katılıyorum	4. Katılıyorum	4. Katılıyorum	4. Katılıyorum	1. Kesinlikle katılmıyorum	4. Katılıyorum	4. Katılıyorum	1. Kesinlikle katılmıyorum	1. Kesinlikle katılmıyorum	1. Kesinlikle katılmıyorum	1. Kesinlikle katılmıyorum	1. Kesinlikle katılmıyorum	4. Katılıyorum	4. Katılıyorum	2. Katılmıyorum	4. Katılıyorum	4. Katılıyorum	1. Kesinlikle katılmıyorum	1. Kesinlikle katılmıyorum	1. Kesinlikle katılmıyorum	3. Kararsızım	5. Kesinlikle katılıyorum	1. Kesinlikle katılmıyorum	5. Kesinlikle katılıyorum	2. Katılmıyorum	2. Katılmıyorum	1. Kesinlikle katılmıyorum	4. Katılıyorum	1. Kesinlikle katılmıyorum	1. Kesinlikle katılmıyorum	1. Kesinlikle katılmıyorum	5. Kesinlikle katılıyorum	4. Katılıyorum	4. Katılıyorum	1. Kesinlikle katılmıyorum	1. Kesinlikle katılmıyorum
2021-12-01 11:27:19	5. Kesinlikle katılıyorum	5. Kesinlikle katılıyorum	5. Kesinlikle katılıyorum	5. Kesinlikle katılıyorum	5. Kesinlikle katılıyorum	4. Katılıyorum	5. Kesinlikle katılıyorum	5. Kesinlikle katılıyorum	5. Kesinlikle katılıyorum	5. Kesinlikle katılıyorum	5. Kesinlikle katılıyorum	5. Kesinlikle katılıyorum	5. Kesinlikle katılıyorum	5. Kesinlikle katılıyorum	5. Kesinlikle katılıyorum	5. Kesinlikle katılıyorum	5. Kesinlikle katılıyorum	5. Kesinlikle katılıyorum	5. Kesinlikle katılıyorum	5. Kesinlikle katılıyorum	3. Kararsızım	3. Kararsızım	5. Kesinlikle katılıyorum	5. Kesinlikle katılıyorum	5. Kesinlikle katılıyorum	5. Kesinlikle katılıyorum	5. Kesinlikle katılıyorum	5. Kesinlikle katılıyorum	5. Kesinlikle katılıyorum	5. Kesinlikle katılıyorum	5. Kesinlikle katılıyorum	5. Kesinlikle katılıyorum	5. Kesinlikle katılıyorum	5. Kesinlikle katılıyorum	5. Kesinlikle katılıyorum	5. Kesinlikle katılıyorum	Cok iyi
2021-12-01 11:27:57	4. Katılıyorum	5. Kesinlikle katılıyorum	4. Katılıyorum	4. Katılıyorum	4. Katılıyorum	5. Kesinlikle katılıyorum	5. Kesinlikle katılıyorum	4. Katılıyorum	5. Kesinlikle katılıyorum	5. Kesinlikle katılıyorum	5. Kesinlikle katılıyorum	4. Katılıyorum	5. Kesinlikle katılıyorum	5. Kesinlikle katılıyorum	5. Kesinlikle katılıyorum	4. Katılıyorum	5. Kesinlikle katılıyorum	4. Katılıyorum	5. Kesinlikle katılıyorum	5. Kesinlikle katılıyorum	5. Kesinlikle katılıyorum	3. Kararsızım	3. Kararsızım	5. Kesinlikle katılıyorum	5. Kesinlikle katılıyorum	1. Kesinlikle katılmıyorum	5. Kesinlikle katılıyorum	5. Kesinlikle katılıyorum	4. Katılıyorum	1. Kesinlikle katılmıyorum	3. Kararsızım	3. Kararsızım	5. Kesinlikle katılıyorum	5. Kesinlikle katılıyorum	5. Kesinlikle katılıyorum	5. Kesinlikle katılıyorum
2021-12-01 11:28:45	5. Kesinlikle katılıyorum	5. Kesinlikle katılıyorum	5. Kesinlikle katılıyorum	3. Kararsızım	5. Kesinlikle katılıyorum	5. Kesinlikle katılıyorum	5. Kesinlikle katılıyorum	5. Kesinlikle katılıyorum	5. Kesinlikle katılıyorum	5. Kesinlikle katılıyorum	5. Kesinlikle katılıyorum	5. Kesinlikle katılıyorum	5. Kesinlikle katılıyorum	5. Kesinlikle katılıyorum	5. Kesinlikle katılıyorum	5. Kesinlikle katılıyorum	5. Kesinlikle katılıyorum	5. Kesinlikle katılıyorum	5. Kesinlikle katılıyorum	5. Kesinlikle katılıyorum	5. Kesinlikle katılıyorum	5. Kesinlikle katılıyorum	5. Kesinlikle katılıyorum	5. Kesinlikle katılıyorum	5. Kesinlikle katılıyorum	5. Kesinlikle katılıyorum	5. Kesinlikle katılıyorum	5. Kesinlikle katılıyorum	5. Kesinlikle katılıyorum	5. Kesinlikle katılıyorum	5. Kesinlikle katılıyorum	5. Kesinlikle katılıyorum	5. Kesinlikle katılıyorum	5. Kesinlikle katılıyorum	5. Kesinlikle katılıyorum	5. Kesinlikle katılıyorum
2021-12-01 11:28:55	2. Katılmıyorum	4. Katılıyorum	3. Kararsızım	3. Kararsızım	3. Kararsızım	4. Katılıyorum	5. Kesinlikle katılıyorum	4. Katılıyorum	5. Kesinlikle katılıyorum	5. Kesinlikle katılıyorum	5. Kesinlikle katılıyorum	4. Katılıyorum	4. Katılıyorum	3. Kararsızım	4. Katılıyorum	2. Katılmıyorum	2. Katılmıyorum	5. Kesinlikle katılıyorum	5. Kesinlikle katılıyorum	4. Katılıyorum	5. Kesinlikle katılıyorum	2. Katılmıyorum	2. Katılmıyorum	5. Kesinlikle katılıyorum	4. Katılıyorum	4. Katılıyorum	4. Katılıyorum	5. Kesinlikle katılıyorum	4. Katılıyorum	1. Kesinlikle katılmıyorum	3. Kararsızım	3. Kararsızım	3. Kararsızım	4. Katılıyorum	4. Katılıyorum	3. Kararsızım
2021-12-01 11:30:52	5. Kesinlikle katılıyorum	5. Kesinlikle katılıyorum	5. Kesinlikle katılıyorum	5. Kesinlikle katılıyorum	1. Kesinlikle katılmıyorum	5. Kesinlikle katılıyorum	1. Kesinlikle katılmıyorum	1. Kesinlikle katılmıyorum	1. Kesinlikle katılmıyorum	1. Kesinlikle katılmıyorum	5. Kesinlikle katılıyorum	1. Kesinlikle katılmıyorum	5. Kesinlikle katılıyorum	1. Kesinlikle katılmıyorum	5. Kesinlikle katılıyorum	5. Kesinlikle katılıyorum	5. Kesinlikle katılıyorum	1. Kesinlikle katılmıyorum	1. Kesinlikle katılmıyorum	1. Kesinlikle katılmıyorum	5. Kesinlikle katılıyorum	1. Kesinlikle katılmıyorum	5. Kesinlikle katılıyorum	5. Kesinlikle katılıyorum	5. Kesinlikle katılıyorum	5. Kesinlikle katılıyorum	5. Kesinlikle katılıyorum	5. Kesinlikle katılıyorum	1. Kesinlikle katılmıyorum	1. Kesinlikle katılmıyorum	1. Kesinlikle katılmıyorum	1. Kesinlikle katılmıyorum	5. Kesinlikle katılıyorum	5. Kesinlikle katılıyorum	1. Kesinlikle katılmıyorum	1. Kesinlikle katılmıyorum
2021-12-01 11:31:11	5. Kesinlikle katılıyorum	3. Kararsızım	3. Kararsızım	3. Kararsızım	5. Kesinlikle katılıyorum	1. Kesinlikle katılmıyorum	5. Kesinlikle katılıyorum	5. Kesinlikle katılıyorum	3. Kararsızım	3. Kararsızım	5. Kesinlikle katılıyorum	1. Kesinlikle katılmıyorum	1. Kesinlikle katılmıyorum	5. Kesinlikle katılıyorum	3. Kararsızım	2. Katılmıyorum	3. Kararsızım	5. Kesinlikle katılıyorum	5. Kesinlikle katılıyorum	5. Kesinlikle katılıyorum	3. Kararsızım	2. Katılmıyorum	3. Kararsızım	5. Kesinlikle katılıyorum	1. Kesinlikle katılmıyorum	4. Katılıyorum	1. Kesinlikle katılmıyorum	5. Kesinlikle katılıyorum	5. Kesinlikle katılıyorum	1. Kesinlikle katılmıyorum	5. Kesinlikle katılıyorum	1. Kesinlikle katılmıyorum	4. Katılıyorum	4. Katılıyorum	4. Katılıyorum	4. Katılıyorum
2021-12-01 11:31:13	5. Kesinlikle katılıyorum	5. Kesinlikle katılıyorum	5. Kesinlikle katılıyorum	5. Kesinlikle katılıyorum	5. Kesinlikle katılıyorum	5. Kesinlikle katılıyorum	3. Kararsızım	3. Kararsızım	3. Kararsızım	3. Kararsızım	3. Kararsızım	3. Kararsızım	4. Katılıyorum	2. Katılmıyorum	3. Kararsızım	3. Kararsızım	3. Kararsızım	2. Katılmıyorum	2. Katılmıyorum	2. Katılmıyorum	5. Kesinlikle katılıyorum	5. Kesinlikle katılıyorum	3. Kararsızım	3. Kararsızım	4. Katılıyorum	4. Katılıyorum	4. Katılıyorum	4. Katılıyorum	3. Kararsızım	3. Kararsızım	3. Kararsızım	3. Kararsızım	3. Kararsızım	3. Kararsızım	3. Kararsızım	3. Kararsızım
2021-12-01 11:33:22	4. Katılıyorum	4. Katılıyorum	4. Katılıyorum	4. Katılıyorum	4. Katılıyorum	4. Katılıyorum	4. Katılıyorum	4. Katılıyorum	4. Katılıyorum	4. Katılıyorum	4. Katılıyorum	4. Katılıyorum	4. Katılıyorum	4. Katılıyorum	4. Katılıyorum	4. Katılıyorum	4. Katılıyorum	4. Katılıyorum	4. Katılıyorum	4. Katılıyorum	4. Katılıyorum	4. Katılıyorum	4. Katılıyorum	4. Katılıyorum	4. Katılıyorum	4. Katılıyorum	4. Katılıyorum	4. Katılıyorum	4. Katılıyorum	4. Katılıyorum	4. Katılıyorum	4. Katılıyorum	4. Katılıyorum	4. Katılıyorum	4. Katılıyorum	4. Katılıyorum
2021-12-01 11:33:46	1. Kesinlikle katılmıyorum	4. Katılıyorum	4. Katılıyorum	4. Katılıyorum	4. Katılıyorum	4. Katılıyorum	4. Katılıyorum	4. Katılıyorum	4. Katılıyorum	4. Katılıyorum	4. Katılıyorum	4. Katılıyorum	4. Katılıyorum	4. Katılıyorum	4. Katılıyorum	4. Katılıyorum	4. Katılıyorum	4. Katılıyorum	4. Katılıyorum	4. Katılıyorum	4. Katılıyorum	4. Katılıyorum	4. Katılıyorum	5. Kesinlikle katılıyorum	4. Katılıyorum	1. Kesinlikle katılmıyorum	2. Katılmıyorum	3. Kararsızım	5. Kesinlikle katılıyorum	1. Kesinlikle katılmıyorum	4. Katılıyorum	5. Kesinlikle katılıyorum	5. Kesinlikle katılıyorum	5. Kesinlikle katılıyorum	4. Katılıyorum	4. Katılıyorum
2021-12-01 11:34:06	4. Katılıyorum	5. Kesinlikle katılıyorum	5. Kesinlikle katılıyorum	5. Kesinlikle katılıyorum	5. Kesinlikle katılıyorum	5. Kesinlikle katılıyorum	3. Kararsızım	3. Kararsızım	3. Kararsızım	4. Katılıyorum	5. Kesinlikle katılıyorum	3. Kararsızım	5. Kesinlikle katılıyorum	4. Katılıyorum	4. Katılıyorum	5. Kesinlikle katılıyorum	5. Kesinlikle katılıyorum	4. Katılıyorum	5. Kesinlikle katılıyorum	5. Kesinlikle katılıyorum	4. Katılıyorum	5. Kesinlikle katılıyorum	3. Kararsızım	5. Kesinlikle katılıyorum	5. Kesinlikle katılıyorum	2. Katılmıyorum	4. Katılıyorum	4. Katılıyorum	5. Kesinlikle katılıyorum	1. Kesinlikle katılmıyorum	5. Kesinlikle katılıyorum	4. Katılıyorum	4. Katılıyorum	4. Katılıyorum	4. Katılıyorum	4. Katılıyorum	Işık mikroskopu Sayısı arttırılırsa daha iyi olabilird
2021-12-01 11:34:32	4. Katılıyorum	4. Katılıyorum	4. Katılıyorum	4. Katılıyorum	5. Kesinlikle katılıyorum	4. Katılıyorum	5. Kesinlikle katılıyorum	3. Kararsızım	4. Katılıyorum	4. Katılıyorum	4. Katılıyorum	3. Kararsızım	5. Kesinlikle katılıyorum	3. Kararsızım	5. Kesinlikle katılıyorum	3. Kararsızım	3. Kararsızım	3. Kararsızım	3. Kararsızım	4. Katılıyorum	4. Katılıyorum	2. Katılmıyorum	2. Katılmıyorum	4. Katılıyorum	4. Katılıyorum	3. Kararsızım	4. Katılıyorum	4. Katılıyorum	2. Katılmıyorum	3. Kararsızım	2. Katılmıyorum	4. Katılıyorum	5. Kesinlikle katılıyorum	2. Katılmıyorum	1. Kesinlikle katılmıyorum	5. Kesinlikle katılıyorum	ışık mikroskop öğrenme açısından daha etkili ama sanal mikroskop daha kolay. Ben yine de ışık mikroskobu tercih ederim
2021-12-01 11:34:35	5. Kesinlikle katılıyorum	5. Kesinlikle katılıyorum	5. Kesinlikle katılıyorum	5. Kesinlikle katılıyorum	5. Kesinlikle katılıyorum	5. Kesinlikle katılıyorum	3. Kararsızım	3. Kararsızım	4. Katılıyorum	4. Katılıyorum	4. Katılıyorum	5. Kesinlikle katılıyorum	5. Kesinlikle katılıyorum	4. Katılıyorum	4. Katılıyorum	4. Katılıyorum	4. Katılıyorum	5. Kesinlikle katılıyorum	5. Kesinlikle katılıyorum	5. Kesinlikle katılıyorum	5. Kesinlikle katılıyorum	5. Kesinlikle katılıyorum	3. Kararsızım	5. Kesinlikle katılıyorum	5. Kesinlikle katılıyorum	3. Kararsızım	4. Katılıyorum	4. Katılıyorum	4. Katılıyorum	2. Katılmıyorum	4. Katılıyorum	4. Katılıyorum	5. Kesinlikle katılıyorum	5. Kesinlikle katılıyorum	3. Kararsızım	4. Katılıyorum
2021-12-01 11:35:59	5. Kesinlikle katılıyorum	5. Kesinlikle katılıyorum	5. Kesinlikle katılıyorum	5. Kesinlikle katılıyorum	5. Kesinlikle katılıyorum	5. Kesinlikle katılıyorum	4. Katılıyorum	5. Kesinlikle katılıyorum	5. Kesinlikle katılıyorum	5. Kesinlikle katılıyorum	5. Kesinlikle katılıyorum	5. Kesinlikle katılıyorum	4. Katılıyorum	5. Kesinlikle katılıyorum	5. Kesinlikle katılıyorum	4. Katılıyorum	5. Kesinlikle katılıyorum	5. Kesinlikle katılıyorum	4. Katılıyorum	5. Kesinlikle katılıyorum	5. Kesinlikle katılıyorum	4. Katılıyorum	5. Kesinlikle katılıyorum	5. Kesinlikle katılıyorum	5. Kesinlikle katılıyorum	2. Katılmıyorum	4. Katılıyorum	4. Katılıyorum	4. Katılıyorum	3. Kararsızım	5. Kesinlikle katılıyorum	3. Kararsızım	5. Kesinlikle katılıyorum	5. Kesinlikle katılıyorum	4. Katılıyorum	4. Katılıyorum
2021-12-01 11:36:11	5. Kesinlikle katılıyorum	5. Kesinlikle katılıyorum	5. Kesinlikle katılıyorum	5. Kesinlikle katılıyorum	5. Kesinlikle katılıyorum	5. Kesinlikle katılıyorum	5. Kesinlikle katılıyorum	5. Kesinlikle katılıyorum	5. Kesinlikle katılıyorum	5. Kesinlikle katılıyorum	5. Kesinlikle katılıyorum	5. Kesinlikle katılıyorum	5. Kesinlikle katılıyorum	5. Kesinlikle katılıyorum	5. Kesinlikle katılıyorum	5. Kesinlikle katılıyorum	5. Kesinlikle katılıyorum	5. Kesinlikle katılıyorum	5. Kesinlikle katılıyorum	5. Kesinlikle katılıyorum	5. Kesinlikle katılıyorum	5. Kesinlikle katılıyorum	5. Kesinlikle katılıyorum	5. Kesinlikle katılıyorum	5. Kesinlikle katılıyorum	5. Kesinlikle katılıyorum	5. Kesinlikle katılıyorum	5. Kesinlikle katılıyorum	5. Kesinlikle katılıyorum	2. Katılmıyorum	5. Kesinlikle katılıyorum	5. Kesinlikle katılıyorum	5. Kesinlikle katılıyorum	5. Kesinlikle katılıyorum	2. Katılmıyorum	5. Kesinlikle katılıyorum	Gayet verimli
2021-12-01 11:37:29	5. Kesinlikle katılıyorum	5. Kesinlikle katılıyorum	5. Kesinlikle katılıyorum	5. Kesinlikle katılıyorum	5. Kesinlikle katılıyorum	5. Kesinlikle katılıyorum	2. Katılmıyorum	4. Katılıyorum	4. Katılıyorum	4. Katılıyorum	1. Kesinlikle katılmıyorum	2. Katılmıyorum	5. Kesinlikle katılıyorum	4. Katılıyorum	5. Kesinlikle katılıyorum	5. Kesinlikle katılıyorum	5. Kesinlikle katılıyorum	4. Katılıyorum	4. Katılıyorum	4. Katılıyorum	5. Kesinlikle katılıyorum	2. Katılmıyorum	4. Katılıyorum	4. Katılıyorum	5. Kesinlikle katılıyorum	2. Katılmıyorum	4. Katılıyorum	4. Katılıyorum	2. Katılmıyorum	2. Katılmıyorum	4. Katılıyorum	3. Kararsızım	5. Kesinlikle katılıyorum	5. Kesinlikle katılıyorum	2. Katılmıyorum	1. Kesinlikle katılmıyorum
2021-12-01 11:37:46	4. Katılıyorum	4. Katılıyorum	3. Kararsızım	3. Kararsızım	3. Kararsızım	5. Kesinlikle katılıyorum	5. Kesinlikle katılıyorum	4. Katılıyorum	4. Katılıyorum	4. Katılıyorum	4. Katılıyorum	4. Katılıyorum	2. Katılmıyorum	4. Katılıyorum	5. Kesinlikle katılıyorum	5. Kesinlikle katılıyorum	5. Kesinlikle katılıyorum	5. Kesinlikle katılıyorum	5. Kesinlikle katılıyorum	5. Kesinlikle katılıyorum	4. Katılıyorum	4. Katılıyorum	4. Katılıyorum	4. Katılıyorum	4. Katılıyorum	4. Katılıyorum	4. Katılıyorum	4. Katılıyorum	5. Kesinlikle katılıyorum	2. Katılmıyorum	5. Kesinlikle katılıyorum	3. Kararsızım	4. Katılıyorum	5. Kesinlikle katılıyorum	4. Katılıyorum	4. Katılıyorum
2021-12-01 11:38:14	4. Katılıyorum	5. Kesinlikle katılıyorum	5. Kesinlikle katılıyorum	5. Kesinlikle katılıyorum	5. Kesinlikle katılıyorum	4. Katılıyorum	4. Katılıyorum	5. Kesinlikle katılıyorum	5. Kesinlikle katılıyorum	5. Kesinlikle katılıyorum	5. Kesinlikle katılıyorum	4. Katılıyorum	5. Kesinlikle katılıyorum	5. Kesinlikle katılıyorum	4. Katılıyorum	4. Katılıyorum	4. Katılıyorum	4. Katılıyorum	5. Kesinlikle katılıyorum	5. Kesinlikle katılıyorum	4. Katılıyorum	4. Katılıyorum	4. Katılıyorum	4. Katılıyorum	4. Katılıyorum	3. Kararsızım	4. Katılıyorum	4. Katılıyorum	4. Katılıyorum	2. Katılmıyorum	4. Katılıyorum	3. Kararsızım	4. Katılıyorum	4. Katılıyorum	4. Katılıyorum	4. Katılıyorum	kullanımı derse katılımı artırıyor ve keyifli hale getiriyor
2021-12-01 11:38:28	5. Kesinlikle katılıyorum	5. Kesinlikle katılıyorum	5. Kesinlikle katılıyorum	5. Kesinlikle katılıyorum	4. Katılıyorum	5. Kesinlikle katılıyorum	5. Kesinlikle katılıyorum	5. Kesinlikle katılıyorum	5. Kesinlikle katılıyorum	5. Kesinlikle katılıyorum	4. Katılıyorum	5. Kesinlikle katılıyorum	5. Kesinlikle katılıyorum	5. Kesinlikle katılıyorum	5. Kesinlikle katılıyorum	5. Kesinlikle katılıyorum	5. Kesinlikle katılıyorum	5. Kesinlikle katılıyorum	5. Kesinlikle katılıyorum	5. Kesinlikle katılıyorum	5. Kesinlikle katılıyorum	4. Katılıyorum	5. Kesinlikle katılıyorum	4. Katılıyorum	5. Kesinlikle katılıyorum	1. Kesinlikle katılmıyorum	5. Kesinlikle katılıyorum	5. Kesinlikle katılıyorum	5. Kesinlikle katılıyorum	1. Kesinlikle katılmıyorum	5. Kesinlikle katılıyorum	5. Kesinlikle katılıyorum	5. Kesinlikle katılıyorum	5. Kesinlikle katılıyorum	5. Kesinlikle katılıyorum	4. Katılıyorum	Görüntüler gayet netti sadece sınavdan önce ders arada erişimimiz daha fazla olsa daha iyi olurdu
2021-12-01 11:39:06	5. Kesinlikle katılıyorum	5. Kesinlikle katılıyorum	5. Kesinlikle katılıyorum	5. Kesinlikle katılıyorum	5. Kesinlikle katılıyorum	5. Kesinlikle katılıyorum	5. Kesinlikle katılıyorum	5. Kesinlikle katılıyorum	5. Kesinlikle katılıyorum	5. Kesinlikle katılıyorum	5. Kesinlikle katılıyorum	5. Kesinlikle katılıyorum	5. Kesinlikle katılıyorum	5. Kesinlikle katılıyorum	5. Kesinlikle katılıyorum	5. Kesinlikle katılıyorum	5. Kesinlikle katılıyorum	5. Kesinlikle katılıyorum	5. Kesinlikle katılıyorum	5. Kesinlikle katılıyorum	5. Kesinlikle katılıyorum	5. Kesinlikle katılıyorum	5. Kesinlikle katılıyorum	5. Kesinlikle katılıyorum	5. Kesinlikle katılıyorum	1. Kesinlikle katılmıyorum	3. Kararsızım	5. Kesinlikle katılıyorum	3. Kararsızım	2. Katılmıyorum	5. Kesinlikle katılıyorum	4. Katılıyorum	5. Kesinlikle katılıyorum	5. Kesinlikle katılıyorum	5. Kesinlikle katılıyorum	5. Kesinlikle katılıyorum
2021-12-01 11:39:25	5. Kesinlikle katılıyorum	5. Kesinlikle katılıyorum	5. Kesinlikle katılıyorum	4. Katılıyorum	4. Katılıyorum	3. Kararsızım	4. Katılıyorum	2. Katılmıyorum	3. Kararsızım	4. Katılıyorum	5. Kesinlikle katılıyorum	2. Katılmıyorum	4. Katılıyorum	5. Kesinlikle katılıyorum	4. Katılıyorum	2. Katılmıyorum	2. Katılmıyorum	5. Kesinlikle katılıyorum	5. Kesinlikle katılıyorum	5. Kesinlikle katılıyorum	3. Kararsızım	4. Katılıyorum	2. Katılmıyorum	5. Kesinlikle katılıyorum	5. Kesinlikle katılıyorum	4. Katılıyorum	4. Katılıyorum	4. Katılıyorum	4. Katılıyorum	1. Kesinlikle katılmıyorum	5. Kesinlikle katılıyorum	2. Katılmıyorum	4. Katılıyorum	4. Katılıyorum	2. Katılmıyorum	2. Katılmıyorum
2021-12-01 11:39:53	3. Kararsızım	4. Katılıyorum	4. Katılıyorum	4. Katılıyorum	5. Kesinlikle katılıyorum	5. Kesinlikle katılıyorum	3. Kararsızım	3. Kararsızım	4. Katılıyorum	4. Katılıyorum	4. Katılıyorum	1. Kesinlikle katılmıyorum	4. Katılıyorum	4. Katılıyorum	4. Katılıyorum	4. Katılıyorum	4. Katılıyorum	4. Katılıyorum	4. Katılıyorum	4. Katılıyorum	4. Katılıyorum	1. Kesinlikle katılmıyorum	1. Kesinlikle katılmıyorum	4. Katılıyorum	4. Katılıyorum	1. Kesinlikle katılmıyorum	3. Kararsızım	4. Katılıyorum	4. Katılıyorum	2. Katılmıyorum	3. Kararsızım	5. Kesinlikle katılıyorum	5. Kesinlikle katılıyorum	5. Kesinlikle katılıyorum	3. Kararsızım	3. Kararsızım
2021-12-01 11:40:54	4. Katılıyorum	4. Katılıyorum	4. Katılıyorum	4. Katılıyorum	4. Katılıyorum	3. Kararsızım	5. Kesinlikle katılıyorum	4. Katılıyorum	4. Katılıyorum	4. Katılıyorum	3. Kararsızım	4. Katılıyorum	4. Katılıyorum	4. Katılıyorum	5. Kesinlikle katılıyorum	5. Kesinlikle katılıyorum	5. Kesinlikle katılıyorum	5. Kesinlikle katılıyorum	4. Katılıyorum	4. Katılıyorum	4. Katılıyorum	4. Katılıyorum	4. Katılıyorum	3. Kararsızım	4. Katılıyorum	1. Kesinlikle katılmıyorum	4. Katılıyorum	3. Kararsızım	4. Katılıyorum	1. Kesinlikle katılmıyorum	4. Katılıyorum	4. Katılıyorum	4. Katılıyorum	5. Kesinlikle katılıyorum	4. Katılıyorum	4. Katılıyorum
2021-12-01 11:41:44	4. Katılıyorum	5. Kesinlikle katılıyorum	4. Katılıyorum	5. Kesinlikle katılıyorum	3. Kararsızım	5. Kesinlikle katılıyorum	5. Kesinlikle katılıyorum	5. Kesinlikle katılıyorum	5. Kesinlikle katılıyorum	5. Kesinlikle katılıyorum	5. Kesinlikle katılıyorum	5. Kesinlikle katılıyorum	4. Katılıyorum	5. Kesinlikle katılıyorum	4. Katılıyorum	4. Katılıyorum	4. Katılıyorum	5. Kesinlikle katılıyorum	5. Kesinlikle katılıyorum	5. Kesinlikle katılıyorum	4. Katılıyorum	3. Kararsızım	3. Kararsızım	3. Kararsızım	4. Katılıyorum	4. Katılıyorum	4. Katılıyorum	4. Katılıyorum	5. Kesinlikle katılıyorum	5. Kesinlikle katılıyorum	5. Kesinlikle katılıyorum	5. Kesinlikle katılıyorum	4. Katılıyorum	4. Katılıyorum	5. Kesinlikle katılıyorum	5. Kesinlikle katılıyorum	Sanal mikroskopun hoca tarafından yonetilmesi dersi kolaylastirdi
2021-12-01 11:41:56	4. Katılıyorum	4. Katılıyorum	3. Kararsızım	3. Kararsızım	3. Kararsızım	3. Kararsızım	4. Katılıyorum	4. Katılıyorum	4. Katılıyorum	4. Katılıyorum	4. Katılıyorum	4. Katılıyorum	4. Katılıyorum	5. Kesinlikle katılıyorum	4. Katılıyorum	5. Kesinlikle katılıyorum	5. Kesinlikle katılıyorum	5. Kesinlikle katılıyorum	5. Kesinlikle katılıyorum	5. Kesinlikle katılıyorum	5. Kesinlikle katılıyorum	2. Katılmıyorum	5. Kesinlikle katılıyorum	5. Kesinlikle katılıyorum	5. Kesinlikle katılıyorum	2. Katılmıyorum	4. Katılıyorum	5. Kesinlikle katılıyorum	5. Kesinlikle katılıyorum	2. Katılmıyorum	5. Kesinlikle katılıyorum	2. Katılmıyorum	3. Kararsızım	5. Kesinlikle katılıyorum	4. Katılıyorum	3. Kararsızım
2021-12-01 11:42:15	5. Kesinlikle katılıyorum	4. Katılıyorum	3. Kararsızım	4. Katılıyorum	3. Kararsızım	4. Katılıyorum	5. Kesinlikle katılıyorum	5. Kesinlikle katılıyorum	5. Kesinlikle katılıyorum	5. Kesinlikle katılıyorum	5. Kesinlikle katılıyorum	5. Kesinlikle katılıyorum	2. Katılmıyorum	5. Kesinlikle katılıyorum	3. Kararsızım	3. Kararsızım	3. Kararsızım	5. Kesinlikle katılıyorum	5. Kesinlikle katılıyorum	5. Kesinlikle katılıyorum	5. Kesinlikle katılıyorum	3. Kararsızım	3. Kararsızım	5. Kesinlikle katılıyorum	4. Katılıyorum	5. Kesinlikle katılıyorum	3. Kararsızım	4. Katılıyorum	5. Kesinlikle katılıyorum	1. Kesinlikle katılmıyorum	5. Kesinlikle katılıyorum	3. Kararsızım	4. Katılıyorum	5. Kesinlikle katılıyorum	5. Kesinlikle katılıyorum	2. Katılmıyorum
2021-12-01 11:42:18	3. Kararsızım	5. Kesinlikle katılıyorum	2. Katılmıyorum	3. Kararsızım	5. Kesinlikle katılıyorum	3. Kararsızım	5. Kesinlikle katılıyorum	5. Kesinlikle katılıyorum	5. Kesinlikle katılıyorum	5. Kesinlikle katılıyorum	5. Kesinlikle katılıyorum	5. Kesinlikle katılıyorum	5. Kesinlikle katılıyorum	5. Kesinlikle katılıyorum	5. Kesinlikle katılıyorum	5. Kesinlikle katılıyorum	5. Kesinlikle katılıyorum	5. Kesinlikle katılıyorum	5. Kesinlikle katılıyorum	5. Kesinlikle katılıyorum	5. Kesinlikle katılıyorum	5. Kesinlikle katılıyorum	1. Kesinlikle katılmıyorum	5. Kesinlikle katılıyorum	3. Kararsızım	1. Kesinlikle katılmıyorum	3. Kararsızım	5. Kesinlikle katılıyorum	1. Kesinlikle katılmıyorum	1. Kesinlikle katılmıyorum	5. Kesinlikle katılıyorum	1. Kesinlikle katılmıyorum	5. Kesinlikle katılıyorum	5. Kesinlikle katılıyorum	5. Kesinlikle katılıyorum	5. Kesinlikle katılıyorum	ışık mikroskopide daha çok zaman olmalı kısıtla zamanda öğrenmek zor
2021-12-01 11:43:33	5. Kesinlikle katılıyorum	5. Kesinlikle katılıyorum	5. Kesinlikle katılıyorum	4. Katılıyorum	4. Katılıyorum	4. Katılıyorum	3. Kararsızım	4. Katılıyorum	4. Katılıyorum	3. Kararsızım	3. Kararsızım	3. Kararsızım	4. Katılıyorum	4. Katılıyorum	3. Kararsızım	3. Kararsızım	4. Katılıyorum	3. Kararsızım	4. Katılıyorum	4. Katılıyorum	4. Katılıyorum	3. Kararsızım	3. Kararsızım	3. Kararsızım	5. Kesinlikle katılıyorum	3. Kararsızım	4. Katılıyorum	4. Katılıyorum	3. Kararsızım	2. Katılmıyorum	4. Katılıyorum	2. Katılmıyorum	5. Kesinlikle katılıyorum	5. Kesinlikle katılıyorum	5. Kesinlikle katılıyorum	5. Kesinlikle katılıyorum
2021-12-01 11:44:10	4. Katılıyorum	4. Katılıyorum	4. Katılıyorum	5. Kesinlikle katılıyorum	5. Kesinlikle katılıyorum	5. Kesinlikle katılıyorum	5. Kesinlikle katılıyorum	5. Kesinlikle katılıyorum	5. Kesinlikle katılıyorum	5. Kesinlikle katılıyorum	5. Kesinlikle katılıyorum	5. Kesinlikle katılıyorum	4. Katılıyorum	4. Katılıyorum	5. Kesinlikle katılıyorum	4. Katılıyorum	4. Katılıyorum	5. Kesinlikle katılıyorum	4. Katılıyorum	4. Katılıyorum	5. Kesinlikle katılıyorum	3. Kararsızım	5. Kesinlikle katılıyorum	3. Kararsızım	3. Kararsızım	4. Katılıyorum	4. Katılıyorum	5. Kesinlikle katılıyorum	3. Kararsızım	4. Katılıyorum	4. Katılıyorum	5. Kesinlikle katılıyorum	5. Kesinlikle katılıyorum	5. Kesinlikle katılıyorum	5. Kesinlikle katılıyorum	5. Kesinlikle katılıyorum
2021-12-01 11:44:17	3. Kararsızım	3. Kararsızım	3. Kararsızım	3. Kararsızım	3. Kararsızım	3. Kararsızım	3. Kararsızım	3. Kararsızım	3. Kararsızım	3. Kararsızım	3. Kararsızım	3. Kararsızım	3. Kararsızım	3. Kararsızım	3. Kararsızım	3. Kararsızım	3. Kararsızım	3. Kararsızım	3. Kararsızım	3. Kararsızım	3. Kararsızım	3. Kararsızım	3. Kararsızım	3. Kararsızım	3. Kararsızım	3. Kararsızım	3. Kararsızım	3. Kararsızım	3. Kararsızım	3. Kararsızım	3. Kararsızım	3. Kararsızım	3. Kararsızım	3. Kararsızım	3. Kararsızım	3. Kararsızım
2021-12-01 11:44:26	5. Kesinlikle katılıyorum	5. Kesinlikle katılıyorum	4. Katılıyorum	4. Katılıyorum	5. Kesinlikle katılıyorum	5. Kesinlikle katılıyorum	5. Kesinlikle katılıyorum	5. Kesinlikle katılıyorum	5. Kesinlikle katılıyorum	5. Kesinlikle katılıyorum	5. Kesinlikle katılıyorum	5. Kesinlikle katılıyorum	5. Kesinlikle katılıyorum	5. Kesinlikle katılıyorum	5. Kesinlikle katılıyorum	3. Kararsızım	3. Kararsızım	4. Katılıyorum	4. Katılıyorum	5. Kesinlikle katılıyorum	5. Kesinlikle katılıyorum	3. Kararsızım	5. Kesinlikle katılıyorum	5. Kesinlikle katılıyorum	5. Kesinlikle katılıyorum	4. Katılıyorum	4. Katılıyorum	5. Kesinlikle katılıyorum	4. Katılıyorum	2. Katılmıyorum	5. Kesinlikle katılıyorum	3. Kararsızım	5. Kesinlikle katılıyorum	5. Kesinlikle katılıyorum	2. Katılmıyorum	2. Katılmıyorum	Konu işlenimi anında sanal mikroskop görüntülerinin eklenmesi akılda kalıcılığı arttırabilir
2021-12-01 11:44:52	4. Katılıyorum	4. Katılıyorum	4. Katılıyorum	4. Katılıyorum	4. Katılıyorum	4. Katılıyorum	3. Kararsızım	3. Kararsızım	4. Katılıyorum	4. Katılıyorum	5. Kesinlikle katılıyorum	4. Katılıyorum	4. Katılıyorum	5. Kesinlikle katılıyorum	5. Kesinlikle katılıyorum	5. Kesinlikle katılıyorum	3. Kararsızım	5. Kesinlikle katılıyorum	5. Kesinlikle katılıyorum	5. Kesinlikle katılıyorum	4. Katılıyorum	3. Kararsızım	4. Katılıyorum	4. Katılıyorum	4. Katılıyorum	2. Katılmıyorum	3. Kararsızım	4. Katılıyorum	4. Katılıyorum	4. Katılıyorum	4. Katılıyorum	4. Katılıyorum	5. Kesinlikle katılıyorum	5. Kesinlikle katılıyorum	4. Katılıyorum	4. Katılıyorum	Yani geri bildirimim yok iyi yani
2021-12-01 11:45:12	4. Katılıyorum	5. Kesinlikle katılıyorum	4. Katılıyorum	4. Katılıyorum	1. Kesinlikle katılmıyorum	3. Kararsızım	3. Kararsızım	3. Kararsızım	4. Katılıyorum	4. Katılıyorum	4. Katılıyorum	4. Katılıyorum	2. Katılmıyorum	4. Katılıyorum	4. Katılıyorum	3. Kararsızım	4. Katılıyorum	4. Katılıyorum	4. Katılıyorum	3. Kararsızım	1. Kesinlikle katılmıyorum	1. Kesinlikle katılmıyorum	4. Katılıyorum	4. Katılıyorum	4. Katılıyorum	2. Katılmıyorum	2. Katılmıyorum	4. Katılıyorum	4. Katılıyorum	4. Katılıyorum	4. Katılıyorum	3. Kararsızım	3. Kararsızım	3. Kararsızım	4. Katılıyorum	4. Katılıyorum
2021-12-01 11:45:52	4. Katılıyorum	3. Kararsızım	4. Katılıyorum	3. Kararsızım	2. Katılmıyorum	3. Kararsızım	4. Katılıyorum	4. Katılıyorum	4. Katılıyorum	4. Katılıyorum	4. Katılıyorum	4. Katılıyorum	3. Kararsızım	4. Katılıyorum	4. Katılıyorum	4. Katılıyorum	4. Katılıyorum	4. Katılıyorum	4. Katılıyorum	4. Katılıyorum	4. Katılıyorum	2. Katılmıyorum	3. Kararsızım	4. Katılıyorum	4. Katılıyorum	2. Katılmıyorum	3. Kararsızım	2. Katılmıyorum	4. Katılıyorum	2. Katılmıyorum	4. Katılıyorum	2. Katılmıyorum	2. Katılmıyorum	3. Kararsızım	4. Katılıyorum	4. Katılıyorum	sanal mikroskopi daha iyi
2021-12-01 11:46:12	4. Katılıyorum	5. Kesinlikle katılıyorum	5. Kesinlikle katılıyorum	5. Kesinlikle katılıyorum	5. Kesinlikle katılıyorum	5. Kesinlikle katılıyorum	4. Katılıyorum	4. Katılıyorum	4. Katılıyorum	4. Katılıyorum	4. Katılıyorum	4. Katılıyorum	5. Kesinlikle katılıyorum	5. Kesinlikle katılıyorum	5. Kesinlikle katılıyorum	5. Kesinlikle katılıyorum	5. Kesinlikle katılıyorum	5. Kesinlikle katılıyorum	5. Kesinlikle katılıyorum	5. Kesinlikle katılıyorum	5. Kesinlikle katılıyorum	4. Katılıyorum	5. Kesinlikle katılıyorum	5. Kesinlikle katılıyorum	5. Kesinlikle katılıyorum	2. Katılmıyorum	5. Kesinlikle katılıyorum	5. Kesinlikle katılıyorum	5. Kesinlikle katılıyorum	1. Kesinlikle katılmıyorum	5. Kesinlikle katılıyorum	5. Kesinlikle katılıyorum	5. Kesinlikle katılıyorum	5. Kesinlikle katılıyorum	2. Katılmıyorum	2. Katılmıyorum
2021-12-01 11:46:23	5. Kesinlikle katılıyorum	5. Kesinlikle katılıyorum	5. Kesinlikle katılıyorum	5. Kesinlikle katılıyorum	5. Kesinlikle katılıyorum	5. Kesinlikle katılıyorum	4. Katılıyorum	4. Katılıyorum	4. Katılıyorum	4. Katılıyorum	4. Katılıyorum	4. Katılıyorum	5. Kesinlikle katılıyorum	4. Katılıyorum	5. Kesinlikle katılıyorum	5. Kesinlikle katılıyorum	5. Kesinlikle katılıyorum	4. Katılıyorum	4. Katılıyorum	4. Katılıyorum	5. Kesinlikle katılıyorum	5. Kesinlikle katılıyorum	5. Kesinlikle katılıyorum	5. Kesinlikle katılıyorum	5. Kesinlikle katılıyorum	5. Kesinlikle katılıyorum	5. Kesinlikle katılıyorum	5. Kesinlikle katılıyorum	5. Kesinlikle katılıyorum	5. Kesinlikle katılıyorum	5. Kesinlikle katılıyorum	5. Kesinlikle katılıyorum	5. Kesinlikle katılıyorum	5. Kesinlikle katılıyorum	4. Katılıyorum	4. Katılıyorum
2021-12-01 11:47:02	4. Katılıyorum	4. Katılıyorum	4. Katılıyorum	4. Katılıyorum	4. Katılıyorum	4. Katılıyorum	4. Katılıyorum	3. Kararsızım	3. Kararsızım	4. Katılıyorum	5. Kesinlikle katılıyorum	3. Kararsızım	4. Katılıyorum	4. Katılıyorum	4. Katılıyorum	3. Kararsızım	3. Kararsızım	4. Katılıyorum	5. Kesinlikle katılıyorum	5. Kesinlikle katılıyorum	5. Kesinlikle katılıyorum	3. Kararsızım	3. Kararsızım	4. Katılıyorum	4. Katılıyorum	3. Kararsızım	3. Kararsızım	4. Katılıyorum	4. Katılıyorum	2. Katılmıyorum	2. Katılmıyorum	2. Katılmıyorum	4. Katılıyorum	4. Katılıyorum	3. Kararsızım	3. Kararsızım
2021-12-01 11:47:34	4. Katılıyorum	3. Kararsızım	4. Katılıyorum	5. Kesinlikle katılıyorum	5. Kesinlikle katılıyorum	5. Kesinlikle katılıyorum	5. Kesinlikle katılıyorum	3. Kararsızım	3. Kararsızım	2. Katılmıyorum	5. Kesinlikle katılıyorum	1. Kesinlikle katılmıyorum	5. Kesinlikle katılıyorum	1. Kesinlikle katılmıyorum	5. Kesinlikle katılıyorum	5. Kesinlikle katılıyorum	5. Kesinlikle katılıyorum	5. Kesinlikle katılıyorum	3. Kararsızım	5. Kesinlikle katılıyorum	5. Kesinlikle katılıyorum	5. Kesinlikle katılıyorum	1. Kesinlikle katılmıyorum	5. Kesinlikle katılıyorum	3. Kararsızım	1. Kesinlikle katılmıyorum	5. Kesinlikle katılıyorum	2. Katılmıyorum	1. Kesinlikle katılmıyorum	2. Katılmıyorum	2. Katılmıyorum	1. Kesinlikle katılmıyorum	5. Kesinlikle katılıyorum	5. Kesinlikle katılıyorum	1. Kesinlikle katılmıyorum	1. Kesinlikle katılmıyorum
2021-12-01 11:47:57	4. Katılıyorum	5. Kesinlikle katılıyorum	5. Kesinlikle katılıyorum	5. Kesinlikle katılıyorum	5. Kesinlikle katılıyorum	5. Kesinlikle katılıyorum	5. Kesinlikle katılıyorum	5. Kesinlikle katılıyorum	5. Kesinlikle katılıyorum	5. Kesinlikle katılıyorum	5. Kesinlikle katılıyorum	5. Kesinlikle katılıyorum	4. Katılıyorum	4. Katılıyorum	5. Kesinlikle katılıyorum	3. Kararsızım	3. Kararsızım	5. Kesinlikle katılıyorum	3. Kararsızım	3. Kararsızım	5. Kesinlikle katılıyorum	3. Kararsızım	5. Kesinlikle katılıyorum	3. Kararsızım	5. Kesinlikle katılıyorum	3. Kararsızım	5. Kesinlikle katılıyorum	5. Kesinlikle katılıyorum	5. Kesinlikle katılıyorum	3. Kararsızım	5. Kesinlikle katılıyorum	5. Kesinlikle katılıyorum	5. Kesinlikle katılıyorum	5. Kesinlikle katılıyorum	5. Kesinlikle katılıyorum	5. Kesinlikle katılıyorum
2021-12-01 11:48:13	4. Katılıyorum	4. Katılıyorum	4. Katılıyorum	4. Katılıyorum	4. Katılıyorum	3. Kararsızım	3. Kararsızım	3. Kararsızım	3. Kararsızım	3. Kararsızım	3. Kararsızım	3. Kararsızım	4. Katılıyorum	4. Katılıyorum	4. Katılıyorum	4. Katılıyorum	4. Katılıyorum	4. Katılıyorum	5. Kesinlikle katılıyorum	4. Katılıyorum	4. Katılıyorum	3. Kararsızım	4. Katılıyorum	4. Katılıyorum	4. Katılıyorum	3. Kararsızım	4. Katılıyorum	3. Kararsızım	4. Katılıyorum	2. Katılmıyorum	3. Kararsızım	3. Kararsızım	4. Katılıyorum	4. Katılıyorum	4. Katılıyorum	4. Katılıyorum
2021-12-01 11:48:40	5. Kesinlikle katılıyorum	5. Kesinlikle katılıyorum	5. Kesinlikle katılıyorum	5. Kesinlikle katılıyorum	4. Katılıyorum	4. Katılıyorum	4. Katılıyorum	4. Katılıyorum	5. Kesinlikle katılıyorum	5. Kesinlikle katılıyorum	5. Kesinlikle katılıyorum	3. Kararsızım	3. Kararsızım	3. Kararsızım	4. Katılıyorum	4. Katılıyorum	4. Katılıyorum	5. Kesinlikle katılıyorum	5. Kesinlikle katılıyorum	5. Kesinlikle katılıyorum	4. Katılıyorum	4. Katılıyorum	4. Katılıyorum	4. Katılıyorum	5. Kesinlikle katılıyorum	5. Kesinlikle katılıyorum	4. Katılıyorum	3. Kararsızım	5. Kesinlikle katılıyorum	2. Katılmıyorum	4. Katılıyorum	5. Kesinlikle katılıyorum	5. Kesinlikle katılıyorum	5. Kesinlikle katılıyorum	5. Kesinlikle katılıyorum	5. Kesinlikle katılıyorum
2021-12-01 11:48:48	4. Katılıyorum	4. Katılıyorum	4. Katılıyorum	4. Katılıyorum	3. Kararsızım	5. Kesinlikle katılıyorum	4. Katılıyorum	4. Katılıyorum	4. Katılıyorum	4. Katılıyorum	5. Kesinlikle katılıyorum	3. Kararsızım	4. Katılıyorum	5. Kesinlikle katılıyorum	4. Katılıyorum	3. Kararsızım	3. Kararsızım	4. Katılıyorum	4. Katılıyorum	4. Katılıyorum	4. Katılıyorum	4. Katılıyorum	3. Kararsızım	5. Kesinlikle katılıyorum	3. Kararsızım	3. Kararsızım	3. Kararsızım	4. Katılıyorum	5. Kesinlikle katılıyorum	2. Katılmıyorum	4. Katılıyorum	3. Kararsızım	5. Kesinlikle katılıyorum	5. Kesinlikle katılıyorum	3. Kararsızım	5. Kesinlikle katılıyorum	ikisinden de memnunum ama ışık mik. daha etkili
2021-12-01 11:49:07	4. Katılıyorum	3. Kararsızım	2. Katılmıyorum	3. Kararsızım	4. Katılıyorum	5. Kesinlikle katılıyorum	3. Kararsızım	4. Katılıyorum	2. Katılmıyorum	2. Katılmıyorum	3. Kararsızım	4. Katılıyorum	4. Katılıyorum	4. Katılıyorum	4. Katılıyorum	3. Kararsızım	4. Katılıyorum	4. Katılıyorum	2. Katılmıyorum	3. Kararsızım	5. Kesinlikle katılıyorum	3. Kararsızım	4. Katılıyorum	3. Kararsızım	3. Kararsızım	4. Katılıyorum	3. Kararsızım	4. Katılıyorum	1. Kesinlikle katılmıyorum	1. Kesinlikle katılmıyorum	4. Katılıyorum	3. Kararsızım	4. Katılıyorum	3. Kararsızım	4. Katılıyorum	2. Katılmıyorum
2021-12-01 11:49:39	3. Kararsızım	4. Katılıyorum	4. Katılıyorum	4. Katılıyorum	4. Katılıyorum	4. Katılıyorum	3. Kararsızım	3. Kararsızım	3. Kararsızım	3. Kararsızım	3. Kararsızım	3. Kararsızım	5. Kesinlikle katılıyorum	3. Kararsızım	5. Kesinlikle katılıyorum	5. Kesinlikle katılıyorum	5. Kesinlikle katılıyorum	3. Kararsızım	3. Kararsızım	3. Kararsızım	5. Kesinlikle katılıyorum	3. Kararsızım	2. Katılmıyorum	3. Kararsızım	5. Kesinlikle katılıyorum	1. Kesinlikle katılmıyorum	5. Kesinlikle katılıyorum	3. Kararsızım	3. Kararsızım	3. Kararsızım	3. Kararsızım	3. Kararsızım	5. Kesinlikle katılıyorum	5. Kesinlikle katılıyorum	2. Katılmıyorum	2. Katılmıyorum
2021-12-01 11:50:07	3. Kararsızım	3. Kararsızım	3. Kararsızım	3. Kararsızım	3. Kararsızım	3. Kararsızım	3. Kararsızım	3. Kararsızım	3. Kararsızım	3. Kararsızım	3. Kararsızım	3. Kararsızım	1. Kesinlikle katılmıyorum	1. Kesinlikle katılmıyorum	4. Katılıyorum	4. Katılıyorum	3. Kararsızım	4. Katılıyorum	4. Katılıyorum	3. Kararsızım	3. Kararsızım	3. Kararsızım	3. Kararsızım	3. Kararsızım	3. Kararsızım	3. Kararsızım	3. Kararsızım	3. Kararsızım	3. Kararsızım	3. Kararsızım	3. Kararsızım	3. Kararsızım	3. Kararsızım	3. Kararsızım	3. Kararsızım	3. Kararsızım
2021-12-01 11:50:25	4. Katılıyorum	5. Kesinlikle katılıyorum	5. Kesinlikle katılıyorum	5. Kesinlikle katılıyorum	5. Kesinlikle katılıyorum	5. Kesinlikle katılıyorum	5. Kesinlikle katılıyorum	5. Kesinlikle katılıyorum	5. Kesinlikle katılıyorum	5. Kesinlikle katılıyorum	5. Kesinlikle katılıyorum	4. Katılıyorum	3. Kararsızım	5. Kesinlikle katılıyorum	4. Katılıyorum	5. Kesinlikle katılıyorum	4. Katılıyorum	5. Kesinlikle katılıyorum	5. Kesinlikle katılıyorum	5. Kesinlikle katılıyorum	4. Katılıyorum	3. Kararsızım	5. Kesinlikle katılıyorum	5. Kesinlikle katılıyorum	5. Kesinlikle katılıyorum	4. Katılıyorum	5. Kesinlikle katılıyorum	5. Kesinlikle katılıyorum	5. Kesinlikle katılıyorum	5. Kesinlikle katılıyorum	5. Kesinlikle katılıyorum	5. Kesinlikle katılıyorum	5. Kesinlikle katılıyorum	5. Kesinlikle katılıyorum	5. Kesinlikle katılıyorum	5. Kesinlikle katılıyorum

## Sheet: English-language codebook
Zaman damgası	Time stamp
A. Etkinlik [Işık mikroskop kullanarak zamanımı etkili bir şekilde yönetebildim]	A. Activity [I was able to manage my time effectively using a light microscope]
A. Etkinlik [Işık mikroskop dersin amaç ve öğrenim hedefleri doğrultusunda etkilidir]	A. Activity [Light microscope is effective in line with the aims and learning objectives of the lesson]
A. Etkinlik [Işık mikroskop kullanımı konuların akılda kalıcılığını artırdı]	A. Activity [The use of light microscope increased the memorability of the topics]
A. Etkinlik [Işık mikroskop konuyu öğrenmeme yardımcı oldu]	A. Activity. [Light microscope helped me learn the subject]
A. Etkinlik [Işık mikroskopinin ders saatleri dışında kullanımı histoloji pratik sınavına hazırlanırken bilgilere erişimimi kolaylaştırdı.]	A. Activity[The use of light microscopy outside of class hours facilitated my access to information while preparing for the histology practical exam].
A. Etkinlik [Derste Işık mikroskop kullanımı histoloji konularına merakımı ve motivasyonumu artırdı.]	A. Activity [Using the light microscope in class increased my curiosity and motivation for histology topics].
A. Etkinlik [Sanal mikroskop kullanarak zamanımı etkili bir şekilde yönetebildim]	A. Activity [Using the virtual microscope allowed me to manage my time effectively]
A. Etkinlik [Sanal mikroskop dersin amaç ve öğrenim hedefleri doğrultusunda etkilidir]	A. Activity [Virtual microscope is effective in line with the aims and learning objectives of the course]
A. Etkinlik [Sanal mikroskop kullanımı konuların akılda kalıcılığını artırdı.]	A. Activity [The use of virtual microscope increased the retention of the topics].
A. Etkinlik [Sanal mikroskop konuyu öğrenmeme yardımcı oldu]	A. Activity [Virtual microscope helped me learn the subject]
A. Etkinlik [Sanal mikroskopinin ders saatleri dışında kullanımı histoloji pratik sınavına hazırlanırken bilgilere erişimimi kolaylaştırdı.]	A. Activity [Using the virtual microscope outside of class hours facilitated my access to information while preparing for the histology practical exam].
A. Etkinlik [Derste sanal mikroskop kullanımı histoloji konularına merakımı ve motivasyonumu artırdı.]	A. Activity [Using the virtual microscope in class increased my curiosity and motivation for histology topics].
B. Görüntü Kalitesi [Işık mikroskop, dokuları ayrıntılı biçimde büyüterek incelememi kolaylaştırdı]	B. Image Quality [The light microscope made it easier for me to examine the tissues by magnifying them in detail]
B. Görüntü Kalitesi [Sanal mikroskop, dokuları ayrıntılı biçimde büyüterek incelememi kolaylaştırdı]	B. Image Quality [The virtual microscope facilitated my examination by magnifying the tissues in detail]
C. Kullanım Kolaylığı [Işık mikroskop kullanımı için talimatlar açık ve netti]	C. Ease of Use [Instructions for using the light microscope were clear and concise]
C. Kullanım Kolaylığı [Işık mikroskop kullanımı kolaydı]	C. Ease of Use [The light microscope was easy to use]
C. Kullanım Kolaylığı [Işık mikroskop ile görüntüleri kolayca geziyorum]	C. Ease of Use [I easily navigate the images with the light microscope]
C. Kullanım Kolaylığı [Sanal mikroskop kullanımı için talimatlar açık ve netti]	C. Ease of Use [Instructions for using the virtual microscope were clear and concise]
C. Kullanım Kolaylığı [Sanal mikroskop kullanımı kolaydı]	C. Ease of Use [Virtual microscope was easy to use]
C. Kullanım Kolaylığı [Sanal mikroskop ile görüntüleri kolayca geziyorum]	C. Ease of Use [I can easily navigate the images with the virtual microscope]
D. İşbirlikli Kullanım [Işık mikroskobi, diğer öğrencilerle işbirliği yapmamı sağladı]	D. Collaborative Use [Light microscopy allowed me to collaborate with other students]
D. İşbirlikli Kullanım [Işık mikroskobu planlanan ders saati dışında ve istediğim mekanda kullanabilirim]	D. Collaborative Use [I can use the light microscope outside of the planned class hours and in any place I want]
D. İşbirlikli Kullanım [Sanal mikroskobi, diğer öğrencilerle işbirliği yapmamı sağladı]	D. Collaborative Use [Virtual microscopy allowed me to collaborate with other students]
D. İşbirlikli Kullanım [Sanal mikroskobu planlanan ders saati dışında ve istediğim mekanda kullanabilirim]	D. Collaborative Use [I can use the virtual microscope outside of the planned class hours and at any place I want]
E. Teknik Destek Alma [Işık mikroskop ders saati içerisinde kullanırken, kesitlere eğiticinin müdahalesi daha kolay oldu.]	E. Receiving Technical Support [When using the light microscope during the lesson, it was easier for the instructor to intervene in the sections].
E. Teknik Destek Alma [Işık mikroskop ile görüntüleri gezerken sorun yaşadım]	E. Receiving Technical Support [I had problems while viewing the images with the light microscope]
E. Teknik Destek Alma [Işık mikroskop kullanımı sırasında karşılaşılan teknik sorunlara hemen müdahale edilebilir]	E. Getting Technical Support [Technical problems encountered during the use of the light microscope can be intervened immediately]
E. Teknik Destek Alma [Işık mikroskop kullanımında eğitici desteğine daha çok ihtiyaç duyulmaktadır.]	E. Getting Technical Support [Instructor support is needed more in the use of light microscope].
E. Teknik Destek Alma [Sanal mikroskop ders saati içerisinde kullanırken, kesitlere eğiticinin müdahalesi daha kolay oldu.]	E. Receiving Technical Support [When using the virtual microscope during the lesson, it was easier for the instructor to intervene in the sections].
E. Teknik Destek Alma [Sanal mikroskop ile görüntüleri gezerken sorun yaşadım]	E. Receiving Technical Support [I had problems navigating the images with the virtual microscope]
E. Teknik Destek Alma [Sanal mikroskop kullanımı sırasında karşılaşılan teknik sorunlara hemen müdahale edilebilir]	E. Getting Technical Support [Technical problems encountered during the use of the virtual microscope can be intervened immediately]
E. Teknik Destek Alma [Sanal mikroskop kullanımında eğitici desteğine daha çok ihtiyaç duyulmaktadır.]	E. Receiving Technical Support [Instructor support is needed more in the use of virtual microscope].
F. Tercih/ eğlence durumu [Histoloji dersinde öğrenim aracı olarak Işık mikroskobu tercih ederim]	F. Preference / entertainment status [I prefer light microscope as a learning tool in histology course]
F. Tercih/ eğlence durumu [Işık mikroskobu histoloji eğitiminde kullanmak eğlencelidir.]	F. Preference/fun status [It is fun to use the light microscope in histology education].
F. Tercih/ eğlence durumu [Histoloji dersinde öğrenim aracı olarak sanal mikroskobu tercih ederim]	F. Preference/ recreational status [I prefer virtual microscope as a learning tool in histology course]
F. Tercih/ eğlence durumu [Sanal mikroskobu histoloji eğitiminde kullanmak eğlencelidir.]	F. Preference/fun status [It is fun to use virtual microscopy in histology education].
19. Sanal mikroskopi ve Işık mikroskopinin histoloji eğitiminize katkılarını ve geliştirilmesi gereken yönleri ile ilgili her türlü ek geri bildirimi yazınız.	19. Please write down any additional feedback about the contribution of Virtual microscopy and Light microscopy to your histology education and any aspects that need to be improved.
5. Kesinlikle katılıyorum	5. Strongly agree
4. Katılıyorum	4. I agree
3. Kararsızım	3. Undecided
2. Katılmıyorum	2. I disagree
1. Kesinlikle katılmıyorum	1. Strongly disagree
